# Supplementary material for: Overall Efficacy and Safety of Sodium-Glucose Cotransporter 2 Inhibitor Luseogliflozin Versus Dipeptidyl-Peptidase 4 Inhibitors: Multicenter, Open-Label, Randomized-Controlled Trial (J-SELECT study)
Source: PubMed Central journal article supplement — Diabetes Ther. 2023 Jul 6;14(9):1517–35. doi: 10.1007/s13300-023-01438-w (PMC10363101; doi:10.1007/s13300-023-01438-w), 2023-07-06
Supplement: 13300_2023_1438_MOESM1_ESM.pdf [file 13300_2023_1438_MOESM1_ESM.pdf]

Title:

**Overall efficacy and safety of sodium-glucose cotransporter 2 inhibitor luseogliflozin versus dipeptidyl-peptidase 4 inhibitors: multicenter, open-label, randomized-controlled trial (J-SELECT study)**

Masahiro Sugawara<sup>1</sup>; Masahiro Fukuda<sup>2</sup>; Ichiro Sakuma<sup>3</sup>; Yutaka Wakasa<sup>4</sup>; Hideaki Funayama<sup>5</sup>; Akira Kondo<sup>6</sup>; Naoki Itabashi<sup>7</sup>; Yasuyuki Maruyama<sup>8</sup>; Takashi Kamiyama<sup>9</sup>; Yasunori Utsunomiya<sup>10</sup>; Akira Yamauchi<sup>11</sup>; Hidenori Yoshii<sup>12</sup>; Hirokazu Yamada<sup>13</sup>; Koichi Mochizuki<sup>14</sup>; on behalf of the J-SELECT study investigators

<sup>1</sup>Sugawara Clinic, 3-9-16 Syakujii-machi, Nerima, Tokyo 177-0041, Japan

<sup>2</sup>Fukuda Clinic, 1-6-1, Miyahara, Yodogawa, Osaka, Osaka 532-0003, Japan

<sup>3</sup>Caress Sapporo Hokko Memorial Clinic, Kita-17, Higashi-8, 1-15, Sapporo, Hokkaido 065-0027, Japan

<sup>4</sup>Wakasa Medical Clinic, 3-16-25, Sainen, Kanazawa, Ishikawa 920-0024, Japan

<sup>5</sup>Funayama Medical Clinic, 1-13-14 Tomioka, Koto, Tokyo 135-0047, Japan

<sup>6</sup>Kondo Hospital, 1-6-25 Nishi-Shinhama-cho, Tokushima 770-8008, Japan

<sup>7</sup>Itabashi Clinic, 815-1, Higashi-Ushigaya, Koga, Ibaraki 306-0232, Japan

<sup>8</sup>Iwatsuki-Minami Hospital, 2256 Kuroya Iwatsuki, Saitama, Saitama 339-0033, Japan

<sup>9</sup>Kamiyama Clinic, 5-21-18, Takanodai, Nerima, Tokyo 177-0033, Japan

<sup>10</sup>Hoya Hospital, 4-50-15 Minami-Oizumi, Nerima, Tokyo 178-0064, Japan

<sup>11</sup>Suruga Clinic, 9-23, Shoufuku-cho, Shimizu, Shizuoka, Shizuoka 424-0855, Japan

<sup>12</sup>Juntendo Tokyo Koto Geriatric Medical Center, Department of Diabetes and Endocrinology, 3-3-20

Shinsuna, Koto, Tokyo 136-0075, Japan

<sup>13</sup>Soiken Inc., Chiyoda, Tokyo 101-0052, Japan

<sup>14</sup>Mochizuki Naika Clinic, 4-5, Aioi-cho, Itabashi, Tokyo 174-0044, Japan

**Corresponding author:**

Masahiro Sugawara

Sugawara Clinic, 3-9-16 Syakujii-machi, Nerima, Tokyo, 177-0041, Japan

Tel: +81-3- 3996-3016, Fax: +81-3- 3996-4316

E-mail: [ms@sugawara.or.jp](mailto:ms@sugawara.or.jp)

**Table S1.** Participating medical institutions

| Participating medical institution                                                         | Responsible investigator | Number of enrolled patients |
|-------------------------------------------------------------------------------------------|--------------------------|-----------------------------|
| Caress Sapporo Hokko Memorial Clinic                                                      | Ichiro Sakuma            | 50                          |
| Wakasa Medical Clinic                                                                     | Yutaka Wakasa            | 46                          |
| Sugawara Clinic                                                                           | Masahiro Sugawara        | 43                          |
| Funayama Medical Clinic                                                                   | Hideaki Funayama         | 34                          |
| Fukuda Clinic                                                                             | Masahiro Fukuda          | 27                          |
| Seino Internal Medicine Clinic                                                            | Hiroaki Seino            | 20                          |
| Kondo Hospital                                                                            | Akira Kondo              | 20                          |
| Itabashi Clinic                                                                           | Naoki Itabashi           | 17                          |
| Iwatsuki-minami hospital                                                                  | Yasuyuki Maruyama        | 17                          |
| Suisyokai Murata Hospital                                                                 | Kaori Murata             | 16                          |
| Hoya Hospital                                                                             | Yasunori Utsunomiya      | 15                          |
| Suruga Clinic                                                                             | Akira Yamauchi           | 15                          |
| Department of Diabetes and Endocrinology, Juntendo Tokyo Koto<br>Geriatric Medical Center | Hidenori Yoshii          | 15                          |
| Yatagai Clinic                                                                            | Shigeo Yatagai           | 14                          |
| Koyama Clinic                                                                             | Hiroshi Koyama           | 14                          |
| Oedo Orthopedics and Internal medicine                                                    | Takashi Kamiyama         | 12                          |
| Yamamoto Clinic                                                                           | Hareaki Yamamoto         | 12                          |
| Mikokorokai Shimizu Clinic                                                                | Miho Shimizu             | 11                          |
| Kawada Clinic                                                                             | Toshio Kawada            | 10                          |
| Yayoi Medical Clinic                                                                      | Setsuya Sakagashira      | 10                          |
| Ozeki Clinic                                                                              | Shigehiko Ozeki          | 9                           |
| Takeda Clinic                                                                             | Tomoo Takeda             | 9                           |
| Katsuya Clinic                                                                            | Tomohiro Katsuya         | 8                           |
| Oishi Clinic                                                                              | Mariko Oishi             | 8                           |

|                                                |                    |   |
|------------------------------------------------|--------------------|---|
| Doniwa Iin                                     | Ken-ich Doniwa     | 7 |
| Ueda Clinic for Internal Diseases              | Nobuyuki Ueda      | 7 |
| Sasamoto Medical Clinic                        | Makiko Sasamoto    | 7 |
| Masaki Clinic                                  | Hatsumi Masaki     | 6 |
| Kamiyama Clinic                                | Takashi Kamiyama   | 5 |
| Lee's Clinic                                   | Woon-Joo Lee       | 5 |
| Chimori Clinic                                 | Hiroko Chimori     | 5 |
| Takeda Clinic                                  | Hiroshi Takeda     | 5 |
| Ikeda Clinic                                   | Kazuo Ikeda        | 5 |
| Mochizuki Naika Clinic                         | Koichi Mochizuki   | 4 |
| Nishioka Clinic                                | Hiroaki Nishioka   | 4 |
| Jintendo Iin                                   | Kyoko Mitsuhashi   | 4 |
| Kinugawa Cardiology Clinic                     | Toru Kinugawa      | 4 |
| Ken Clinic                                     | Motoko Miki        | 4 |
| Kyoujokai Iin                                  | Toshiyuki Horiuchi | 4 |
| Doi Naika                                      | Kunihiro Doi       | 4 |
| Shinagawa Naika Iin                            | Yuki Shinagawa     | 3 |
| Shimozono Clinic                               | Isato Shimozono    | 3 |
| Medical Corporation Keishinkai Ishizuka Clinic | Jinro Ishizuka     | 3 |
| Sakurai Naika Clinic                           | Shunichiro Sakurai | 3 |
| Moritani Iin                                   | Shigeki Moritani   | 3 |
| Kase Iin                                       | Norio Kase         | 3 |
| Daiba Clinic                                   | Shigeru Watanabe   | 3 |
| Nakata Clinic                                  | Shinsuke Nakata    | 3 |
| Ekimae Tsunoda Clinic                          | Keiko Tsunoda      | 3 |
| Konishibashi Clinic                            | Tadashi Sawanishi  | 3 |
| Ogawa Naika Clinic                             | Yuji Ogawa         | 3 |

|                                                 |                    |   |
|-------------------------------------------------|--------------------|---|
| Kaisei Diabetes Clinic                          | Tomokazu Matsuda   | 3 |
| HAT Kobe Tsuji Naika                            | Tomohiro Tsuji     | 3 |
| H.E.C. Science Clinic                           | Shinichiro Shirabe | 3 |
| Ichou internal medicine Ashitomi                | Satoshi Ashitomi   | 3 |
| Mimihara Ohtori Clinic                          | Hiromi Ogata       | 3 |
| Matsuo Kenko Clinic                             | Kaneyuki Matsuo    | 2 |
| Sugie Internal medicine clinic                  | Takashi Sugie      | 2 |
| Takenaka Clinic                                 | Ken Takenaka       | 2 |
| Shonankamakura General Hospital                 | Asami Tanaka       | 2 |
| Hiyoko Clinic Medical Association Himawarikai   | Yoshiro Suzuki     | 2 |
| Sasazuka-Inoue Clinic                           | Masahiro Inoue     | 2 |
| Hasegawa Clinic                                 | Hiroshi Hasegawa   | 2 |
| Nakao Medical Clinic                            | Haruyoshi Nakao    | 2 |
| Nishikawa Clinic                                | Tetsuo Nishikawa   | 2 |
| iryohoujinsyadan jiboukai naikahihuka uematsuin | Mikio Uematsu      | 2 |
| Hotaruno Central Naika                          | Daigaku Uchida     | 2 |
| Miyakawa Internal Medicine Pediatrics Clinic    | Masaaki Miyakawa   | 1 |
| Miura Central Clinic                            | Masahiro Takihata  | 1 |
| Kato Internal Medicine Clinic                   | Hiroataka Ishii    | 1 |
| Mizuno Medical Clinic                           | Kenji Mizuno       | 1 |
| Inomata Clinic                                  | Masahiko Inomata   | 1 |
| Minamisawa Iin                                  | Kosuke Minamisawa  | 1 |
| Minami Hospital                                 | Soichi Honda       | 1 |
| Sisigui Clinic                                  | Mitsuo Shirakawa   | 1 |
| Uonuma Municipal Koide Hospital                 | Katsuya Fuse       | 1 |
| Yamao Internal Medicine Clinic                  | Takuji Yamao       | 1 |
| Licht Clinic                                    | Akihiko Nakazima   | 1 |

|                                                          |                   |   |
|----------------------------------------------------------|-------------------|---|
| Nagano Clinic                                            | Masahiro Nagano   | 1 |
| iryohoujinzaidannukataikai nakamura clinic               | Masahiko Nakamura | 1 |
| Nishidume Clinic                                         | Suzuko Iwami      | 1 |
| iryohoujinsyadankeneikai miyamaetaiarakenei clinic       | Hisakazu Degawa   | 1 |
| Tokyo Metropolitan Cancer and Infectious Diseases Center | Naoko Katayanagi  | 1 |
| Komagome Hospital                                        |                   |   |
| Okada Clinic                                             | Yoshiharu Okada   | 1 |
| Sawaki Internal Medicine and Diabetes Clinic             | Hideaki Sawaki    | 1 |
| Mimihara Takasago Clinic                                 | Hiromi Ogata      | 1 |
| Sennan Fujii Hospital                                    | Motoshige Miyano  | 1 |
| Clinic Matsuda                                           | Yuki Matsuda      | 1 |

---

**Table S2. Eligibility criteria**

---

|                    |                                                                                                                                                                                                                                                                                                                                                                                                                                                                                                                                                                                                                                                                                                                                                                                                                                                                                                                                                                                                                                                                                                                                                                                                                                                                                                  |
|--------------------|--------------------------------------------------------------------------------------------------------------------------------------------------------------------------------------------------------------------------------------------------------------------------------------------------------------------------------------------------------------------------------------------------------------------------------------------------------------------------------------------------------------------------------------------------------------------------------------------------------------------------------------------------------------------------------------------------------------------------------------------------------------------------------------------------------------------------------------------------------------------------------------------------------------------------------------------------------------------------------------------------------------------------------------------------------------------------------------------------------------------------------------------------------------------------------------------------------------------------------------------------------------------------------------------------|
| Inclusion criteria | <p>Patients who meet all of the following criteria are included in this study.</p> <ol style="list-style-type: none"><li>1. Patients with type 2 diabetes mellitus</li><li>2. Male and female aged 20 years or older and younger than 75 years when giving their consent</li><li>3. Patients who did not use antidiabetic agents within 8 weeks before consenting, or patients who used antidiabetic agents other than SGLT2is and DPP-4is and who did not change the usage and the dose of them within 8 weeks before consenting. However, patients who use SU can be included in the study, if the patients meet all of the following criteria.<ol style="list-style-type: none"><li>i) Patients who regularly receive medical consultation more than once a month within 3 months before consenting.</li><li>ii) Patients whose HbA1c was continuously 7.5% or higher within 3 months before consenting.</li><li>iii) Patients who did not have hypoglycemia within 3 months before consenting.</li><li>iv) Patients who use glimepiride of 2 mg/day or less, or gliclazide of 40 mg/day or less</li></ol></li><li>4. Patients with HbA1c 6.5% or higher but no more than 10.0% within 8 weeks before consenting.</li><li>5. Patients who can give their consent in a written form.</li></ol> |
| Exclusion criteria | <p>Patients who fall into any of the following criteria are excluded from participating in the study.</p> <ol style="list-style-type: none"><li>1. Type 1 diabetes mellitus or secondary diabetes</li><li>2. Patients who used insulin or GLP-1 analogs within 8 weeks before consenting</li><li>3. Patients who had myocardial infarction, cerebral infarction, or stroke within 12 weeks before giving their consent</li><li>4. Patients with severe liver disease (Patients with AST or ALT value five times or more of the upper limit of the stand value in each research institution)</li><li>5. Patients with serious renal disease (eGFR less than 30mL/min/1.73m<sup>2</sup>)</li></ol>                                                                                                                                                                                                                                                                                                                                                                                                                                                                                                                                                                                                 |

---

6. Patients with unstable hypertension and dyslipidemia
  7. Dehydrated patients (patients complain to have a symptom of dehydration)
  8. Patients with urinary tract infection or genital infection
  9. Patients who are breastfeeding, pregnant, possibly pregnant, or planning to be pregnant
  10. Patients with contraindication or hypersensitivity to any medical component of each study drug
  11. Patients who need legal representative for giving consent
  12. Patients aged 65 years or older and 74 years or younger with geriatric syndrome (sarcopenia, cognitive dysfunction, ADL impairment, etc.)
  13. Patients with other conditions that the investigator/researcher thinks inappropriate for the study
- 

SGLT2i, sodium-glucose cotransporter 2 inhibitor; DPP-4i, dipeptidyl-peptidase 4 inhibitor; SU, sulfonylurea; HbA1c, hemoglobin A1c; GLP-1, glucagon-like peptide 1; AST, aspartate aminotransferase; ALT, alanine aminotransferase; eGFR, estimated glomerular filtration rate; ADL: Activities of Daily Living.



**Table S3.** Observation schedule and items

|                                                           | consenting | week 0<br>(Baseline) | week 2<br>+ 1 week | week 24<br>± 2 weeks | week 52<br>± 2 weeks |
|-----------------------------------------------------------|------------|----------------------|--------------------|----------------------|----------------------|
| Eligibility information                                   | ○          |                      |                    |                      |                      |
| Characteristics of patients                               |            | ○                    |                    |                      |                      |
| Medication information                                    |            | ○                    |                    | ○                    | ○                    |
| Weight, blood pressure, pulse,<br>abdominal circumference |            | ○                    |                    | ○                    | ○                    |
| General blood tests                                       |            | ○                    |                    | ○                    | ○                    |
| OHA-Q                                                     |            | △                    |                    | ○                    | ○                    |
| Special blood and urine tests                             |            | ●                    | ●                  | ●                    | ●                    |
| Adverse event                                             |            | ← ○ →                |                    |                      |                      |

○: mandatory; ●: optional; △: mandatory if the patient used any antidiabetic agents other than sodium-glucose cotransporter 2 inhibitor or dipeptidyl-peptidase 4 inhibitors within 8 weeks before consenting.

OHA-Q: Oral Hypoglycemic Agent Questionnaire;

**Table S4.** Primary and secondary endpoints

---

|                     |                                                                                                                                                                                                                                                                                                                                                                                                                                                                                                                                                                                                                                                                                                                                                                                                                                                                                                                                                                                                                                                                                                                                                                                 |
|---------------------|---------------------------------------------------------------------------------------------------------------------------------------------------------------------------------------------------------------------------------------------------------------------------------------------------------------------------------------------------------------------------------------------------------------------------------------------------------------------------------------------------------------------------------------------------------------------------------------------------------------------------------------------------------------------------------------------------------------------------------------------------------------------------------------------------------------------------------------------------------------------------------------------------------------------------------------------------------------------------------------------------------------------------------------------------------------------------------------------------------------------------------------------------------------------------------|
| Primary endpoint    | <p>Proportion of patients who improved three or more endpoints among five endpoints listed below from baseline to week 52 (proportion of patients who achieved the composite endpoints)</p> <ul style="list-style-type: none"><li>- HbA1c (change from baseline <math>\leq</math> -0.37%)</li><li>- Weight (percent change from baseline <math>\leq</math> -3%)</li><li>- eGFR (percent change from baseline <math>\geq</math> -2.2%)</li><li>- systolic blood pressure (change from baseline <math>\leq</math> -4 mmHg)</li><li>- pulse (change from baseline <math>\leq</math> -3 bpm)</li></ul>                                                                                                                                                                                                                                                                                                                                                                                                                                                                                                                                                                              |
| Secondary endpoints | <ol style="list-style-type: none"><li>1. Proportion of patients who achieved the composite endpoints from baseline to week 24</li><li>2. Change in HbA1c from baseline</li><li>3. Percent change in weight from baseline</li><li>4. Percent change in eGFR from baseline</li><li>5. Change in blood pressure from baseline</li><li>6. Change in pulse from baseline</li><li>7. Change in blood test values (or percent change in lipid biomarker values) from baseline<ul style="list-style-type: none"><li>- lipid biomarkers: HDL-cholesterol, Total cholesterol, LDL-cholesterol, TG</li><li>- hepatic biomarkers: AST, ALT, gamma-GTP</li><li>- others: blood count (red blood cell, hemoglobin, hematocrit, leukocyte, platelet), uric acid, Amy</li></ul></li><li>8. Change in specific test values from baseline<ul style="list-style-type: none"><li>- blood test values: NT-proBNP, erythropoietin, reticulocyte</li><li>- urine test values: urinary albumin/creatinine ratio, urinary creatinine</li></ul></li><li>9. Change in OHA-Q (questionnaire for patients QOL) score from baseline</li><li>10. Change in waist circumference and BMI from baseline</li></ol> |

---

## 11. Frequency of adverse events

---

HbA1c, hemoglobin A1c; eGFR, estimated glomerular filtration rate; HDL-C, high-density lipoprotein cholesterol; T-chol, total cholesterol; LDL-chol, low-density lipoprotein cholesterol; TG, triglyceride; AST, aspartate aminotransferase; ALT, alanine aminotransferase;  $\gamma$ -GTP, gamma-glutamyl transpeptidase; NT-proBNP, amino-terminal pro-brain natriuretic peptide; OHA-Q: Oral Hypoglycemic Agent Questionnaire

**Table S5.** Change in medication during the study

|                            | Week | Luseogliflozin group | DPP-4i group     | p value |
|----------------------------|------|----------------------|------------------|---------|
| Use of anti-diabetic agent | 0    | 119 (43.0) / 277     | 111 (40.8) / 272 | 0.61    |
|                            | 24   | 277 (100.0) / 277    | 270 (99.6) / 271 | 0.49*   |
|                            | 52   | 273 (99.3) / 275     | 264 (98.9) / 267 | 0.68*   |
| SGLT2i                     | 0    | 0 (0.0) / 277        | 0 (0.0) / 272    | -       |
|                            | 24   | 269 (97.1) / 277     | 5 (1.8) / 271    | <0.001  |
|                            | 52   | 266 (96.7) / 275     | 9 (3.4) / 267    | <0.001  |
| DPP-4i                     | 0    | 0 (0.0) / 277        | 0 (0.0) / 272    | -       |
|                            | 24   | 2 (0.7) / 277        | 268 (98.9) / 271 | <0.001  |
|                            | 52   | 7 (2.5) / 275        | 261 (97.8) / 267 | <0.001  |
| sulfonylurea               | 0    | 2 (0.7) / 277        | 3 (1.1) / 272    | 0.68*   |
|                            | 24   | 3 (1.1) / 277        | 3 (1.1) / 271    | 1.00*   |
|                            | 52   | 4 (1.5) / 275        | 5 (1.9) / 267    | 0.75*   |
| biguanide                  | 0    | 107 (38.6) / 277     | 103 (37.9) / 272 | 0.85    |
|                            | 24   | 113 (40.8) / 277     | 106 (39.1) / 271 | 0.69    |
|                            | 52   | 115 (41.8) / 275     | 109 (40.8) / 267 | 0.81    |
| alfa-glucosidase inhibitor | 0    | 8 (2.9) / 277        | 8 (2.9) / 272    | 0.97    |
|                            | 24   | 9 (3.2) / 277        | 8 (3.0) / 271    | 0.84    |
|                            | 52   | 9 (3.3) / 275        | 6 (2.2) / 267    | 0.47    |
| glinide                    | 0    | 4 (1.4) / 277        | 3 (1.1) / 272    | 1.00*   |
|                            | 24   | 5 (1.8) / 277        | 3 (1.1) / 271    | 0.72*   |
|                            | 52   | 3 (1.1) / 275        | 3 (1.1) / 267    | 1.00*   |
| thiazolidine               | 0    | 15 (5.4) / 277       | 12 (4.4) / 272   | 0.59    |
|                            | 24   | 17 (6.1) / 277       | 13 (4.8) / 271   | 0.49    |
|                            | 52   | 18 (6.5) / 275       | 13 (4.9) / 267   | 0.40    |
| GLP-1 receptor agonist     | 0    | 0 (0.0) / 277        | 0 (0.0) / 272    | -       |

|                        |    |                  |                  |       |
|------------------------|----|------------------|------------------|-------|
|                        | 24 | 0 (0.0) / 277    | 0 (0.0) / 271    | -     |
|                        | 52 | 1 (0.4) / 275    | 0 (0.0) / 267    | 1.00* |
| insulin                | 0  | 0 (0.0) / 277    | 0 (0.0) / 272    | -     |
|                        | 24 | 0 (0.0) / 277    | 0 (0.0) / 271    | -     |
|                        | 52 | 1 (0.4) / 275    | 0 (0.0) / 267    | 1.00* |
| Antihypertensive agent | 0  | 151 (54.5) / 277 | 157 (57.7) / 272 | 0.45  |
|                        | 24 | 156 (56.3) / 277 | 157 (57.7) / 272 | 0.74  |
|                        | 52 | 157 (57.1) / 275 | 156 (58.4) / 267 | 0.75  |
| Hypolipidemic agent    | 0  | 117 (42.2) / 277 | 123 (45.2) / 272 | 0.48  |
|                        | 24 | 128 (46.2) / 277 | 132 (48.7) / 271 | 0.56  |
|                        | 52 | 130 (47.3) / 275 | 135 (50.6) / 267 | 0.44  |
| Antiplatelet agent     | 0  | 19 (6.9) / 277   | 22 (8.1) / 272   | 0.58  |
|                        | 24 | 20 (7.2) / 277   | 22 (8.1) / 272   | 0.70  |
|                        | 52 | 20 (7.3) / 275   | 22 (8.2) / 267   | 0.67  |

Data are presented as number of patients (%) / N.

Chi-squared test or Fisher's exact test for categorical variables and two-sample t-test for continuous variables were performed.

\* Intergroup comparison was conducted using Fisher's exact test, as it did not meet the requirement of the chi-squared test.

DPP-4i, dipeptidyl peptidase 4 inhibitor; SGLT2i, sodium-glucose cotransporter 2 inhibitor; GLP-1 receptor agonist, glucagon-like peptide 1 receptor agonist

**Figure S1.** Correlation between BMI at baseline and percent change in weight from baseline to week 52

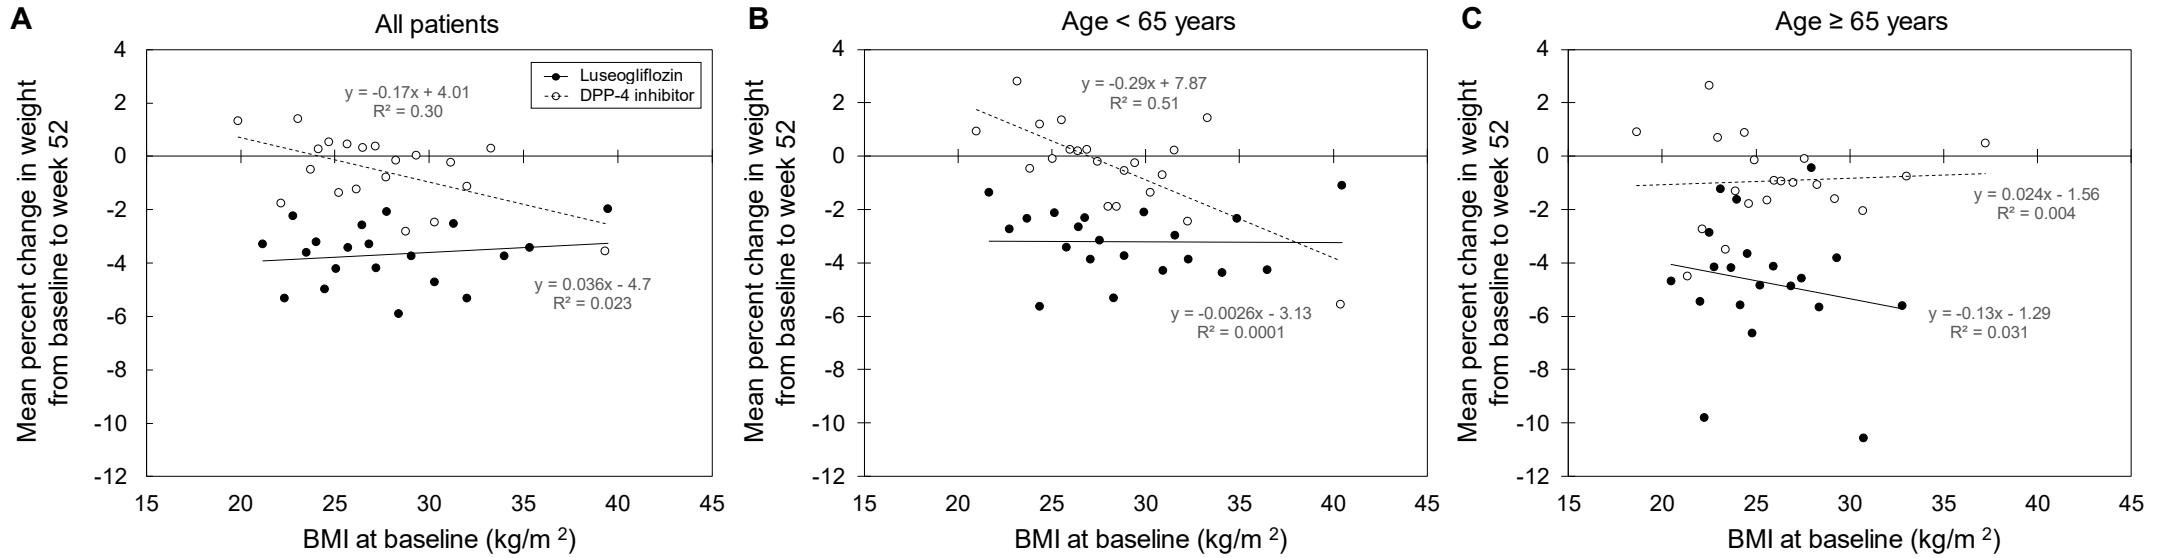

BMI at baseline was divided into 20 quartiles, and the mean BMI at each quartile as X value and mean percent change in weight from baseline to week 52 at each quartile as Y value were plotted.

DPP-4, dipeptidyl-peptidase 4; BMI, body mass index

**Figure S2.** Change in hepatic function biomarkers

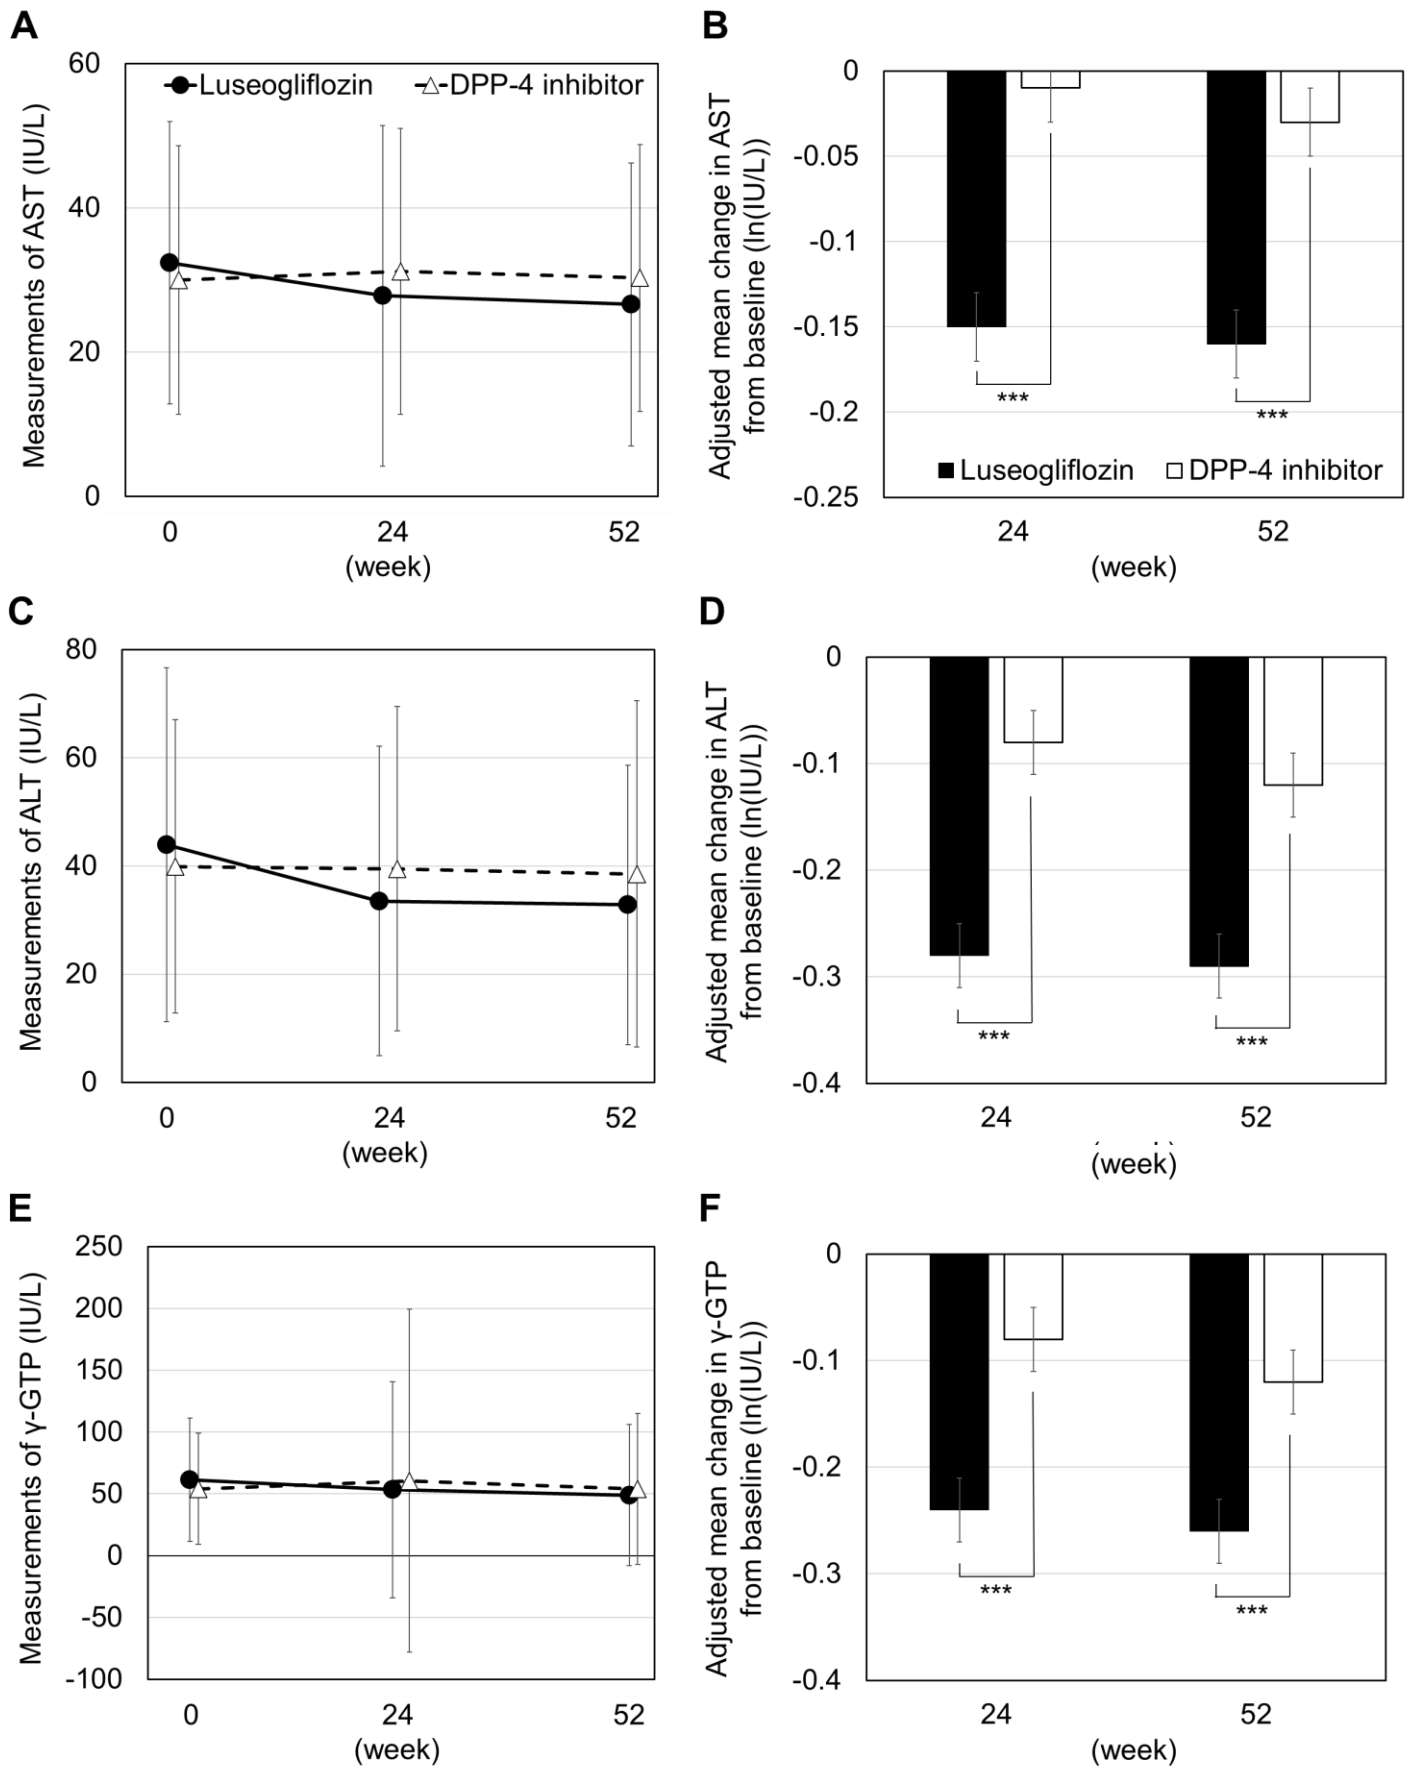

Data are presented as mean  $\pm$  standard deviation for measurements or mean  $\pm$  standard error for adjusted mean change from baseline.

A two-sample t-test was performed for between-group comparisons of measurements. Since the measurements of AST, ALT, and  $\gamma$ -GTP did not distribute normally, the two-sample t-test was performed using log-transformed values.

The adjusted mean change of each continuous variable was estimated using models for repeated measures (MMRM) with an unstructured covariance structure with treatment group, time, interaction between treatment group and time, values at baseline, and allocation factors as fixed effects, and enrolled patients as random effects.

\*, \*\*, and \*\*\* represent  $p < 0.05$ ,  $p < 0.01$ , and  $p < 0.001$ , respectively.

DPP-4, dipeptidyl-peptidase 4; AST, aspartate aminotransferase; ALT, alanine aminotransferase;  $\gamma$ -GTP, gamma-glutamyl transpeptidase.



**Table S6.** Changes in other laboratory tests and vital signs

|                                        | Week | Luseogliflozin group |                                         | DPP-4i group        |                                         | Intergroup difference in      |         |
|----------------------------------------|------|----------------------|-----------------------------------------|---------------------|-----------------------------------------|-------------------------------|---------|
|                                        |      | Measurement (n)      | adjusted mean change from baseline (SE) | Measurement (n)     | adjusted mean change from baseline (SE) | adjusted mean change (95% CI) | p value |
| Red blood cell (x 10 <sup>4</sup> /μL) | 0    | 486.3±44.1 (271)     |                                         | 480.0±41.8 (266)    |                                         |                               |         |
|                                        | 24   | 505.4±47.2 (269)     | 16.7 (1.7)                              | 478.5±44.1 (259)    | -4.8 (1.7)                              | 21.5 (17.1, 26.0)             | <0.001  |
|                                        | 52   | 499.5±50.3 (264)     | 11.0 (1.8)                              | 477.5±43.8 (257)    | -4.6 (1.9)                              | 15.6 (10.7, 20.5)             | <0.001  |
| Hemoglobin (g/dL)                      | 0    | 14.9±1.4 (271)       |                                         | 14.7±1.3 (266)      |                                         |                               |         |
|                                        | 24   | 15.4±1.5 (269)       | 0.5 (0.0)                               | 14.6±1.4 (259)      | -0.2 (0.1)                              | 0.7 (0.5, 0.8)                | <0.001  |
|                                        | 52   | 15.3±1.6 (264)       | 0.4 (0.1)                               | 14.6±1.4 (257)      | -0.2 (0.1)                              | 0.6 (0.4, 0.7)                | <0.001  |
| Hematocrit (%)                         | 0    | 45.1±3.8 (271)       |                                         | 44.6±3.6 (265)      |                                         |                               |         |
|                                        | 24   | 46.9±3.9 (269)       | 1.6 (0.1)                               | 44.4±3.8 (259)      | -0.6 (0.2)                              | 2.2 (1.8, 2.5)                | <0.001  |
|                                        | 52   | 46.7±4.4 (264)       | 1.4 (0.2)                               | 44.4±3.8 (257)      | -0.4 (0.2)                              | 1.8 (1.4, 2.3)                | <0.001  |
| White blood cell (/μL)                 | 0    | 6679.2±1707.4 (270)  |                                         | 6677.2±1791.9 (264) |                                         |                               |         |
|                                        | 24   | 6565.7±1684.4 (269)  | -173.9 (76.4)                           | 6702.9±1861.6 (259) | -46.1 (77.7)                            | -127.8 (-333.4, 77.8)         | 0.22    |
|                                        | 52   | 6379.6±1587.3 (264)  | -341.5 (72.9)                           | 6779.9±1852.4 (256) | 48.4 (73.5)                             | -389.9 (-584.6, -195.1)       | <0.001  |
| Platelet (x 10 <sup>4</sup> /μL)       | 0    | 24.6±6.3 (270)       |                                         | 24.9±5.8 (264)      |                                         |                               |         |
|                                        | 24   | 24.0±6.3 (269)       | -0.7 (0.2)                              | 24.3±6.0 (259)      | -0.6 (0.2)                              | -0.1 (-0.6, 0.5)              | 0.77    |

|                                         |    |                 |              |                 |              |                      |        |
|-----------------------------------------|----|-----------------|--------------|-----------------|--------------|----------------------|--------|
|                                         | 52 | 23.7±6.4 (263)  | -1.0 (0.2)   | 24.2±5.8 (255)  | -0.5 (0.2)   | -0.5 (-1.0, 0.1)     | 0.11   |
| Uric acid (mg/dL)                       | 0  | 5.53±1.32 (272) |              | 5.39±1.37 (268) |              |                      |        |
|                                         | 24 | 4.99±1.39 (265) | -0.61 (0.05) | 5.60±1.33 (259) | 0.08 (0.05)  | -0.69 (-0.84, -0.55) | <0.001 |
|                                         | 52 | 5.03±1.25 (262) | -0.56 (0.05) | 5.45±1.28 (256) | -0.06 (0.05) | -0.49 (-0.64, -0.35) | <0.001 |
| Amy (IU/L)                              | 0  | 64.5±27.2 (240) |              | 65.3±31.1 (228) |              |                      |        |
|                                         | 24 | 70.1±29.7 (250) |              | 70.7±35.2 (227) |              |                      |        |
|                                         | 52 | 69.1±29.6 (247) |              | 72.7±43.1 (226) |              |                      |        |
| Amy (log-transformed) (ln(IU/L))        | 0  | 4.09±0.41 (240) |              | 4.09±0.40 (228) |              |                      |        |
|                                         | 24 | 4.17±0.40 (250) | 0.08 (0.02)  | 4.17±0.41 (227) | 0.07 (0.02)  | 0.01 (-0.04, 0.05)   | 0.77   |
|                                         | 52 | 4.15±0.41 (247) | 0.06 (0.02)  | 4.18±0.44 (226) | 0.10 (0.02)  | -0.04 (-0.08, 0.01)  | 0.09   |
| NT-proBNP (pg/mL)                       | 0  | 33.6±33.0 (93)  |              | 38.7±40.0 (82)  |              |                      |        |
|                                         | 2  | 27.3±20.6 (72)  |              | 40.3±52.3 (66)  |              |                      |        |
|                                         | 24 | 35.6±31.1 (92)  |              | 39.5±56.9 (79)  |              |                      |        |
|                                         | 52 | 30.2±23.8 (85)  |              | 39.4±47.6 (81)  |              |                      |        |
| NT-proBNP (log-transformed) (ln(pg/mL)) | 0  | 3.13±0.90 (93)  |              | 3.22±0.96 (82)  |              |                      |        |
|                                         | 2  | 3.00±0.86 (72)  | -0.05 (0.08) | 3.14±1.05 (66)  | 0.11 (0.08)  | -0.17 (-0.37, 0.04)  | 0.11   |
|                                         | 24 | 3.17±0.97 (92)  | 0.11 (0.07)  | 3.15±1.00 (79)  | 0.03 (0.08)  | 0.08 (-0.11, 0.27)   | 0.42   |
|                                         | 52 | 3.14±0.76 (85)  | 0.09 (0.07)  | 3.16±1.03 (81)  | 0.08 (0.08)  | 0.00 (-0.18, 0.19)   | 0.98   |

|                                               |    |                   |             |                   |              |                    |        |
|-----------------------------------------------|----|-------------------|-------------|-------------------|--------------|--------------------|--------|
| Erythropoietin (mIU/mL)                       | 0  | 9.3±5.2 (91)      |             | 9.6±4.8 (81)      |              |                    |        |
|                                               | 2  | 11.2±4.5 (73)     |             | 10.1±5.4 (66)     |              |                    |        |
|                                               | 24 | 10.1±5.4 (93)     |             | 10.8±9.7 (78)     |              |                    |        |
|                                               | 52 | 10.9±10.2 (87)    |             | 11.1±9.8 (81)     |              |                    |        |
| Erythropoietin (log-transformed) (ln(mIU/mL)) | 0  | 2.11±0.49 (91)    |             | 2.16±0.47 (81)    |              |                    |        |
|                                               | 2  | 2.33±0.41 (73)    | 0.23 (0.04) | 2.22±0.43 (66)    | 0.08 (0.04)  | 0.15 (0.05, 0.25)  | 0.004  |
|                                               | 24 | 2.21±0.44 (93)    | 0.09 (0.04) | 2.19±0.57 (78)    | 0.04 (0.05)  | 0.05 (-0.06, 0.17) | 0.35   |
|                                               | 52 | 2.23±0.49 (87)    | 0.12 (0.04) | 2.24±0.52 (81)    | 0.11 (0.05)  | 0.01 (-0.10, 0.13) | 0.81   |
| Reticulocyte (%)                              | 0  | 17.9±4.8 (93)     |             | 16.5±4.3 (81)     |              |                    |        |
|                                               | 2  | 19.6±5.7 (73)     | 1.8 (0.5)   | 16.4±4.7 (66)     | -0.4 (0.5)   | 2.3 (1.0, 3.6)     | <0.001 |
|                                               | 24 | 17.6±4.5 (92)     | -0.2 (0.4)  | 16.5±5.1 (77)     | -0.2 (0.4)   | 0.0 (-1.1, 1.1)    | 0.97   |
|                                               | 52 | 17.4±4.9 (87)     | -0.2 (0.4)  | 16.2±4.9 (80)     | -0.4 (0.4)   | 0.2 (-0.9, 1.3)    | 0.72   |
| UACR (mg/g•Cre)                               | 0  | 356.2±2306.0 (91) |             | 207.6±519.2 (79)  |              |                    |        |
|                                               | 2  | 268.8±964.4 (74)  |             | 216.9±631.4 (65)  |              |                    |        |
|                                               | 24 | 451.3±1603.9 (91) |             | 250.5±697.0 (78)  |              |                    |        |
|                                               | 52 | 880.4±6529.6 (86) |             | 760.9±4193.7 (79) |              |                    |        |
| UACR (log-transformed) (ln(mg/g•Cre))         | 0  | 3.36±1.77 (91)    |             | 3.46±1.84 (79)    |              |                    |        |
|                                               | 2  | 3.50±1.83 (74)    | 0.12 (0.10) | 3.27±1.88 (65)    | -0.29 (0.11) | 0.41 (0.15, 0.67)  | 0.002  |

|                            |    |                 |             |                  |              |                      |       |
|----------------------------|----|-----------------|-------------|------------------|--------------|----------------------|-------|
|                            | 24 | 3.50±2.11 (91)  | 0.27 (0.15) | 3.39±1.96 (78)   | -0.15 (0.16) | 0.41 (0.00, 0.82)    | 0.048 |
|                            | 52 | 3.45±2.00 (86)  | 0.29 (0.17) | 3.52±2.11 (79)   | -0.02 (0.18) | 0.30 (-0.17, 0.77)   | 0.21  |
| Urinary creatinine (mg/dL) | 0  | 113.4±77.6 (87) |             | 118.1±87.4 (72)  |              |                      |       |
|                            | 2  | 79.2±57.3 (70)  | -29.5 (7.8) | 97.0±84.2 (59)   | -14.3 (8.4)  | -15.2 (-35.9, 5.5)   | 0.15  |
|                            | 24 | 90.4±69.2 (86)  | -25.1 (9.1) | 124.6±104.6 (72) | 10.6 (9.9)   | -35.7 (-60.7, -10.7) | 0.005 |
|                            | 52 | 93.6±75.5 (83)  | -23.3 (9.5) | 110.7±100.2 (77) | -6.5 (10.0)  | -16.8 (-42.6, 9.0)   | 0.20  |

Data are presented as mean ± standard deviation (n) for measurements or mean (standard error (SE)) for adjusted mean change from baseline.

The adjusted mean change of each continuous variable was estimated using models for repeated measures (MMRM) with an unstructured covariance structure with treatment group, time, interaction between treatment group and time, values at baseline, and allocation factors as fixed effects, and enrolled patients as random effects.

DPP-4i, dipeptidyl peptidase 4 inhibitor; Amy, amylase; NT-proBNP, amino-terminal pro-brain natriuretic peptide; UACR, urinary albumin-to-creatinine ratio

**Table S7.** Changes in laboratory tests and vital signs stratified by baseline BMI

|                                    | BMI < 25kg/m <sup>2</sup>    |                              |         | BMI ≥ 25kg/m <sup>2</sup>        |                              |         |
|------------------------------------|------------------------------|------------------------------|---------|----------------------------------|------------------------------|---------|
|                                    | Luseogliflozin group         | DPP-4i group                 | p value | Luseogliflozin group             | DPP-4i group                 | p value |
| HbA1c (%)                          | -0.7±0.7 (84)<br>(p<0.001)   | -0.6±0.6 (82)<br>(p<0.001)   | 0.86    | -0.8±0.8 (180)<br>(p<0.001)      | -0.6±0.9 (179)<br>(p<0.001)  | 0.031   |
| Weight (kg)*                       | -3.8±3.7 (85)<br>(p<0.001)   | 0.2±4.8 (80)<br>(p=0.71)     | <0.001  | -3.6±4.0 (178)<br>(p<0.001)      | -0.8±4.2 (177)<br>(p=0.008)  | <0.001  |
| eGFR (mL/min/1.73m <sup>2</sup> )* | -0.7±12.1 (84)<br>(p=0.58)   | -4.7±10.2 (80)<br>(p<0.001)  | 0.024   | -1.9±12.1 (178)<br>(p=0.035)     | -2.5±13.1 (175)<br>(p=0.011) | 0.64    |
| Systolic blood pressure (mmHg)     | -3.9±16.1 (84)<br>(p=0.029)  | -4.2±14.0 (81)<br>(p=0.009)  | 0.90    | -4.6±15.7 (178)<br>(p<0.001)     | -1.8±17.3 (178)<br>(p=0.17)  | 0.11    |
| Diastolic blood pressure (mmHg)    | -3.7±11.4 (84)<br>(p=0.004)  | -0.9±9.6 (81)<br>(p=0.41)    | 0.09    | -1.9±11.0 (178)<br>(p=0.023)     | -2.3±12.0 (178)<br>(p=0.010) | 0.71    |
| Pulse (bpm)                        | -0.9±9.1 (84)<br>(p=0.35)    | -0.2±9.7 (79)<br>(p=0.86)    | 0.62    | -0.5±10.6 (173)<br>(p=0.57)      | 1.1±10.4 (164)<br>(p=0.16)   | 0.16    |
| HDL-chol (mg/dL)*                  | 10.5±15.8 (81)<br>(p<0.001)  | 2.0±16.2 (78)<br>(p=0.27)    | 0.001   | 7.2±13.9 (175)<br>(p<0.001)      | 4.1±17.6 (173)<br>(p=0.002)  | 0.07    |
| T-chol (mg/dL)*                    | 0.7±13.5 (75)<br>(p=0.65)    | -0.7±14.3 (66)<br>(p=0.68)   | 0.54    | 0.0±14.7 (154)<br>(p=0.99)       | -0.3±14.1 (149)<br>(p=0.78)  | 0.83    |
| LDL-chol (mg/dL)*                  | 0.2±19.7 (54)<br>(p=0.95)    | 2.9±26.9 (48)<br>(p=0.45)    | 0.55    | 0.9±23.8 (118)<br>(p=0.68)       | 1.2±24.9 (105)<br>(p=0.61)   | 0.92    |
| TG (log-transformed) (ln(mg/dL))*  | -3.47±9.50 (62)<br>(p=0.006) | -2.68±11.39 (63)<br>(p=0.07) | 0.67    | -0.62±10.20<br>(139)<br>(p=0.47) | -0.96±8.62 (122)<br>(p=0.22) | 0.77    |
| AST (log-transformed) (ln(IU/L))   | -0.05±0.32 (83)<br>(p=0.13)  | -0.01±0.32 (79)<br>(p=0.75)  | 0.41    | -0.21±0.44 (176)<br>(p<0.001)    | 0.00±0.39 (174)<br>(p=0.99)  | <0.001  |

|                                        |                              |                                |                              |                               |                                  |                                |       |
|----------------------------------------|------------------------------|--------------------------------|------------------------------|-------------------------------|----------------------------------|--------------------------------|-------|
| ALT (log-transformed) (ln(IU/L))       | -0.15±0.40 (83)<br>(p=0.001) | -0.08±0.46 (79)<br>(p=0.13)    | 0.30                         | -0.31±0.55 (176)<br>(p<0.001) | -0.08±0.49 (175)<br>(p=0.037)    | <0.001                         |       |
| γ-GTP (log-transformed) (ln(IU/L))     | -0.19±0.40 (81)<br>(p<0.001) | -0.13±0.47 (79)<br>(p=0.018)   | 0.35                         | -0.28±0.51 (174)<br>(p<0.001) | -0.07±0.43 (171)<br>(p=0.032)    | <0.001                         |       |
| Red blood cell (x 10 <sup>4</sup> /μL) | 7.5±39.3 (82)<br>(p=0.09)    | -2.1±22.1 (78)<br>(p=0.40)     | 0.06                         | 15.5±30.6 (176)<br>(p<0.001)  | -1.9±25.9 (174)<br>(p=0.33)      | <0.001                         |       |
| Hemoglobin (g/dL)                      | 0.4±1.0 (82)<br>(p<0.001)    | -0.1±0.7 (78)<br>(p=0.20)      | <0.001                       | 0.5±0.9 (176)<br>(p<0.001)    | -0.1±0.8 (174)<br>(p=0.28)       | <0.001                         |       |
| Hematocrit (%)                         | 1.3±3.1 (82)<br>(p<0.001)    | -0.2±2.0 (77)<br>(p=0.46)      | <0.001                       | 1.8±2.8 (176)<br>(p<0.001)    | -0.1±2.4 (174)<br>(p=0.61)       | <0.001                         |       |
| White blood cell (/μL)                 |                              | -233.5±981.3 (82)<br>(p=0.034) | 32.2±1303.8 (77)<br>(p=0.83) | 0.15                          | -263.1±1323.9 (175)<br>(p=0.009) | 137.3±1162.4 (173)<br>(p=0.12) | 0.003 |
| Platelet (x 10 <sup>4</sup> /μL)       | -1.1±3.5 (82)<br>(p=0.005)   | -0.7±4.0 (76)<br>(p=0.13)      | 0.50                         | -0.8±2.9 (175)<br>(p<0.001)   | -0.4±3.2 (173)<br>(p=0.07)       | 0.34                           |       |
| Uric acid (mg/dL)                      | -0.54±0.93 (82)<br>(p<0.001) | 0.08±0.71 (78)<br>(p=0.32)     | <0.001                       | -0.50±0.96 (175)<br>(p<0.001) | 0.01±0.98 (174)<br>(p=0.93)      | <0.001                         |       |
| Amy (log-transformed) (ln(IU/L))       | 0.01±0.17 (70)<br>(p=0.57)   | 0.11±0.28 (66)<br>(p=0.001)    | 0.011                        | 0.08±0.25 (148)<br>(p<0.001)  | 0.09±0.22 (140)<br>(p<0.001)     | 0.69                           |       |
| FLI                                    | -9.5±13.8 (53)<br>(p<0.001)  | -3.9±17.3 (51)<br>(p=0.11)     | 0.07                         | -8.6±12.7 (123)<br>(p<0.001)  | -3.6±14.3 (104)<br>(p=0.013)     | 0.005                          |       |
| FIB-4 index (log-transformed)          | 0.10±0.21 (82)<br>(p<0.001)  | 0.06±0.31 (76)<br>(p=0.08)     | 0.46                         | -0.01±0.26 (175)<br>(p=0.71)  | 0.08±0.24 (173)<br>(p<0.001)     | 0.001                          |       |

Data are presented as mean ± standard deviation (n).

Two-sample t-tests were performed for between-group comparisons and one-sample t-tests for within-group comparisons.

\* Percentage change was calculated instead of change.

BMI, body mass index, DPP-4i, dipeptidyl-peptidase 4 inhibitor; HbA1c, hemoglobin A1c; eGFR, estimated glomerular filtration rate; HDL-cholesterol, high-density lipoprotein cholesterol; T-chol, total cholesterol; LDL-cholesterol, low-density lipoprotein cholesterol; TG, triglyceride; AST, aspartate aminotransferase; ALT, alanine aminotransferase;  $\gamma$ -GTP, gamma-glutamyl transpeptidase; Amy, amylase; FLI, fatty liver index; FIB-4 index: fibrosis-4 index

**Table S8.** Changes in laboratory tests and vital signs stratified by baseline age

|                                    | Age < 65 years                |                              |         | Age ≥ 65 years               |                              |         |
|------------------------------------|-------------------------------|------------------------------|---------|------------------------------|------------------------------|---------|
|                                    | Luseogliflozin group          | DPP-4i group                 | p value | Luseogliflozin group         | DPP-4i group                 | p value |
| HbA1c (%)                          | -0.7±0.9 (183)<br>(p<0.001)   | -0.5±0.9 (176)<br>(p<0.001)  | 0.046   | -0.8±0.6 (82)<br>(p<0.001)   | -0.7±0.8 (86)<br>(p<0.001)   | 0.53    |
| Weight (kg)*                       | -3.2±3.5 (180)<br>(p<0.001)   | -0.3±4.7 (174)<br>(p=0.35)   | <0.001  | -4.7±4.4 (83)<br>(p<0.001)   | -0.9±3.7 (83)<br>(p=0.028)   | <0.001  |
| eGFR (mL/min/1.73m <sup>2</sup> )* | -2.0±11.6 (181)<br>(p=0.021)  | -2.7±13.0 (172)<br>(p=0.006) | 0.58    | -0.5±13.1 (81)<br>(p=0.74)   | -4.2±10.6 (83)<br>(p<0.001)  | 0.045   |
| Systolic blood pressure (mmHg)     | -4.5±15.2 (182)<br>(p<0.001)  | -2.2±16.9 (174)<br>(p=0.09)  | 0.17    | -4.0±16.9 (81)<br>(p=0.035)  | -3.6±15.6 (86)<br>(p=0.034)  | 0.88    |
| Diastolic blood pressure (mmHg)    | -2.2±10.5 (182)<br>(p=0.006)  | -2.0±12.0 (174)<br>(p=0.028) | 0.91    | -3.1±12.6 (81)<br>(p=0.030)  | -1.8±10.0 (86)<br>(p=0.10)   | 0.47    |
| Pulse (bpm)                        | -0.3±10.2 (177)<br>(p=0.71)   | 0.9±10.8 (162)<br>(p=0.31)   | 0.32    | -1.4±10.1 (81)<br>(p=0.22)   | 0.3±8.7 (82)<br>(p=0.74)     | 0.25    |
| HDL-chol (mg/dL)*                  | 7.8±13.5 (176)<br>(p<0.001)   | 2.7±15.3 (170)<br>(p=0.024)  | 0.001   | 9.2±16.7 (80)<br>(p<0.001)   | 5.1±20.5 (81)<br>(p=0.027)   | 0.18    |
| T-chol (mg/dL)*                    | 1.2±14.8 (157)<br>(p=0.30)    | -0.2±15.9 (141)<br>(p=0.88)  | 0.42    | -1.9±12.8 (72)<br>(p=0.21)   | -0.9±10.2 (74)<br>(p=0.44)   | 0.60    |
| LDL-chol (mg/dL)*                  | 1.6±24.2 (119)<br>(p=0.46)    | 4.0±26.9 (100)<br>(p=0.14)   | 0.49    | -1.4±18.3 (53)<br>(p=0.57)   | -2.4±22.0 (53)<br>(p=0.43)   | 0.80    |
| TG (log-transformed) (ln(mg/dL))*  | -0.74±10.29 (142)<br>(p=0.39) | -1.10±9.74 (125)<br>(p=0.21) | 0.77    | -3.33±9.27 (59)<br>(p=0.008) | -2.47±9.47 (60)<br>(p=0.048) | 0.62    |
| AST (log-transformed) (ln(IU/L))   | -0.19±0.39 (178)<br>(p<0.001) | 0.00±0.42 (172)<br>(p=0.95)  | <0.001  | -0.09±0.46 (81)<br>(p=0.07)  | -0.02±0.23 (81)<br>(p=0.55)  | 0.18    |
| ALT (log-transformed) (ln(IU/L))   | -0.30±0.49 (178)              | -0.07±0.54 (172)             | <0.001  | -0.18±0.53 (81)              | -0.09±0.33 (82)              | 0.24    |



|                                            |                        |                       |        |                       |                      |        |
|--------------------------------------------|------------------------|-----------------------|--------|-----------------------|----------------------|--------|
|                                            | (p<0.001)              | (p=0.09)              |        | (p=0.004)             | (p=0.012)            |        |
| $\gamma$ -GTP (log-transformed) (ln(IU/L)) | -0.26±0.47 (175)       | -0.06±0.50 (169)      | <0.001 | -0.23±0.49 (80)       | -0.15±0.30 (81)      | 0.24   |
|                                            | (p<0.001)              | (p=0.12)              |        | (p<0.001)             | (p<0.001)            |        |
| Red blood cell (x 10 <sup>4</sup> /μL)     | 16.4±29.0 (177)        | -0.9±25.6 (172)       | <0.001 | 5.4±41.5 (81)         | -4.2±22.7 (80)       | 0.07   |
|                                            | (p<0.001)              | (p=0.63)              |        | (p=0.25)              | (p=0.10)             |        |
| Hemoglobin (g/dL)                          | 0.5±0.8 (177)          | -0.1±0.9 (172)        | <0.001 | 0.3±1.2 (81)          | -0.1±0.6 (80)        | 0.020  |
|                                            | (p<0.001)              | (p=0.23)              |        | (p=0.037)             | (p=0.29)             |        |
| Hematocrit (%)                             | 2.0±2.6 (177)          | -0.1±2.4 (171)        | <0.001 | 0.9±3.4 (81)          | -0.2±2.0 (80)        | 0.014  |
|                                            | (p<0.001)              | (p=0.66)              |        | (p=0.019)             | (p=0.39)             |        |
| White blood cell (/μL)                     | -191.6±1247.5<br>(176) | 165.5±1177.2<br>(170) | 0.007  | -388.5±1164.8<br>(81) | -23.9±1263.0<br>(80) | 0.06   |
|                                            | (p=0.043)              | (p=0.07)              |        | (p=0.004)             | (p=0.87)             |        |
| Platelet (x 10 <sup>4</sup> /μL)           | -0.6±3.0 (176)         | -0.3±3.2 (169)        | 0.39   | -1.4±3.2 (81)         | -1.0±3.8 (80)        | 0.40   |
|                                            | (p=0.008)              | (p=0.21)              |        | (p<0.001)             | (p=0.025)            |        |
| Uric acid (mg/dL)                          | -0.44±0.94 (178)       | -0.02±0.97 (170)      | <0.001 | -0.69±0.94 (79)       | 0.13±0.76 (82)       | <0.001 |
|                                            | (p<0.001)              | (p=0.80)              |        | (p<0.001)             | (p=0.13)             |        |
| Amy (log-transformed) (ln(IU/L))           | 0.06±0.25 (149)        | 0.10±0.26 (139)       | 0.25   | 0.04±0.17 (69)        | 0.10±0.19 (67)       | 0.09   |
|                                            | (p=0.003)              | (p<0.001)             |        | (p=0.038)             | (p<0.001)            |        |
| FLI                                        | -7.7±14.0 (125)        | -3.4±17.2 (106)       | 0.040  | -11.8±9.4 (51)        | -4.2±10.3 (49)       | <0.001 |
|                                            | (p<0.001)              | (p=0.043)             |        | (p<0.001)             | (p=0.006)            |        |
| FIB-4 index (log-transformed)              | 0.00±0.24 (176)        | 0.07±0.28 (169)       | 0.015  | 0.08±0.26 (81)        | 0.08±0.21 (80)       | 0.90   |
|                                            | (p=0.92)               | (p=0.001)             |        | (p=0.008)             | (p=0.001)            |        |

Data are presented as mean ± standard deviation (n).

Two-sample t-tests were performed for between-group comparisons and one-sample t-tests for within-group comparisons.

\* Percentage change was calculated instead of change.

DPP-4i, dipeptidyl-peptidase 4 inhibitor; HbA1c, hemoglobin A1c; eGFR, estimated glomerular filtration rate; HDL-cholesterol, high-density lipoprotein cholesterol; T-chol, total cholesterol; LDL-cholesterol, low-density lipoprotein cholesterol; TG, triglyceride; AST, aspartate aminotransferase; ALT, alanine aminotransferase;  $\gamma$ -GTP, gamma-glutamyl transpeptidase; Amy, amylase; FLI, fatty liver index; FIB-4 index: fibrosis-4 index

**Table S9.** Changes in laboratory tests and vital signs stratified by baseline eGFR

|                                    | 45 ≤ eGFR < 60 mL/min/1.73m <sup>2</sup> |                             |         | eGFR ≥ 60 mL/min/1.73m <sup>2</sup> |                              |         |
|------------------------------------|------------------------------------------|-----------------------------|---------|-------------------------------------|------------------------------|---------|
|                                    | Luseogliflozin group                     | DPP-4i group                | p value | Luseogliflozin group                | DPP-4i group                 | p value |
| HbA1c (%)                          | -0.7±0.8 (27)<br>(p<0.001)               | -0.6±0.9 (23)<br>(p=0.006)  | 0.66    | -0.7±0.8 (233)<br>(p<0.001)         | -0.6±0.8 (233)<br>(p<0.001)  | 0.06    |
| Weight (kg)*                       | -5.3±4.9 (28)<br>(p<0.001)               | -2.1±5.4 (22)<br>(p=0.08)   | 0.034   | -3.5±3.7 (232)<br>(p<0.001)         | -0.4±4.3 (230)<br>(p=0.16)   | <0.001  |
| eGFR (mL/min/1.73m <sup>2</sup> )* | 5.1±16.2 (27)<br>(p=0.11)                | 2.5±11.7 (22)<br>(p=0.32)   | 0.53    | -2.4±11.3 (233)<br>(p=0.001)        | -4.1±11.4 (231)<br>(p<0.001) | 0.11    |
| Systolic blood pressure (mmHg)     | -3.2±19.5 (27)<br>(p=0.40)               | -5.2±18.0 (23)<br>(p=0.18)  | 0.72    | -4.3±15.0 (231)<br>(p<0.001)        | -2.5±16.3 (231)<br>(p=0.023) | 0.21    |
| Diastolic blood pressure (mmHg)    | -6.0±12.7 (27)<br>(p=0.021)              | -2.2±12.1 (23)<br>(p=0.39)  | 0.29    | -2.0±11.0 (231)<br>(p=0.005)        | -2.0±11.3 (231)<br>(p=0.009) | 0.93    |
| Pulse (bpm)                        | -2.2±9.5 (27)<br>(p=0.24)                | 3.2±12.5 (22)<br>(p=0.25)   | 0.09    | -0.3±10.2 (226)<br>(p=0.65)         | 0.5±10.0 (216)<br>(p=0.48)   | 0.41    |
| HDL-cholesterol (mg/dL)*           | 4.1±18.3 (25)<br>(p=0.28)                | 3.3±12.7 (19)<br>(p=0.27)   | 0.87    | 8.6±14.2 (228)<br>(p<0.001)         | 3.4±17.6 (230)<br>(p=0.003)  | <0.001  |
| T-cholesterol (mg/dL)*             | -4.7±15.9 (23)<br>(p=0.17)               | -1.2±12.5 (16)<br>(p=0.70)  | 0.47    | 0.8±14.1 (203)<br>(p=0.42)          | -0.4±14.4 (197)<br>(p=0.71)  | 0.41    |
| LDL-cholesterol (mg/dL)*           | -2.9±18.8 (17)<br>(p=0.53)               | -1.1±17.3 (13)<br>(p=0.83)  | 0.79    | 1.1±22.9 (155)<br>(p=0.56)          | 2.1±26.2 (139)<br>(p=0.36)   | 0.73    |
| TG (log-transformed) (ln(mg/dL))*  | -2.67±11.03 (19)<br>(p=0.31)             | -1.95±6.18 (16)<br>(p=0.23) | 0.82    | -1.38±9.97 (182)<br>(p=0.06)        | -1.49±9.99 (167)<br>(p=0.06) | 0.92    |
| AST (log-transformed) (ln(IU/L))   | -0.19±0.39 (26)<br>(p=0.021)             | -0.07±0.32 (21)<br>(p=0.33) | 0.27    | -0.15±0.42 (230)<br>(p<0.001)       | 0.00±0.38 (230)<br>(p=0.89)  | <0.001  |
| ALT (log-transformed) (ln(IU/L))   | -0.28±0.49 (26)                          | -0.17±0.36 (21)             | 0.40    | -0.25±0.51 (230)                    | -0.07±0.49 (231)             | <0.001  |

|                                            |                   |                   |      |                     |                   |        |
|--------------------------------------------|-------------------|-------------------|------|---------------------|-------------------|--------|
|                                            | (p=0.006)         | (p=0.038)         |      | (p<0.001)           | (p=0.033)         |        |
| $\gamma$ -GTP (log-transformed) (ln(IU/L)) | -0.28±0.48 (25)   | -0.09±0.52 (20)   | 0.21 | -0.24±0.48 (227)    | -0.09±0.44 (228)  | <0.001 |
|                                            | (p=0.007)         | (p=0.42)          |      | (p<0.001)           | (p=0.003)         |        |
| Red blood cell (x 10 <sup>4</sup> /μL)     | 8.4±43.9 (26)     | 5.2±21.9 (21)     | 0.77 | 13.3±32.6 (229)     | -2.5±24.9 (229)   | <0.001 |
|                                            | (p=0.34)          | (p=0.29)          |      | (p<0.001)           | (p=0.13)          |        |
| Hemoglobin (g/dL)                          | 0.1±1.4 (26)      | 0.1±0.7 (21)      | 0.90 | 0.5±0.9 (229)       | -0.1±0.8 (229)    | <0.001 |
|                                            | (p=0.72)          | (p=0.38)          |      | (p<0.001)           | (p=0.08)          |        |
| Hematocrit (%)                             | 0.9±3.8 (26)      | 0.1±2.5 (21)      | 0.41 | 1.7±2.8 (229)       | -0.1±2.3 (228)    | <0.001 |
|                                            | (p=0.23)          | (p=0.83)          |      | (p<0.001)           | (p=0.40)          |        |
| White blood cell (/μL)                     | -247.7±941.9 (26) | 355.7±1198.4 (21) | 0.06 | -229.2±1234.7 (228) | 95.4±1197.7 (227) | 0.005  |
|                                            | (p=0.19)          | (p=0.19)          |      | (p=0.006)           | (p=0.23)          |        |
| Platelet (x 10 <sup>4</sup> /μL)           | -0.8±2.4 (26)     | -0.1±4.0 (21)     | 0.46 | -0.9±3.2 (228)      | -0.6±3.4 (226)    | 0.33   |
|                                            | (p=0.10)          | (p=0.90)          |      | (p<0.001)           | (p=0.015)         |        |
| Uric acid (mg/dL)                          | -0.47±1.31 (26)   | -0.21±0.83 (20)   | 0.44 | -0.51±0.89 (228)    | 0.06±0.91 (230)   | <0.001 |
|                                            | (p=0.08)          | (p=0.27)          |      | (p<0.001)           | (p=0.35)          |        |
| Amy (log-transformed) (ln(IU/L))           | 0.06±0.14 (20)    | 0.12±0.25 (17)    | 0.34 | 0.05±0.24 (196)     | 0.10±0.24 (187)   | 0.08   |
|                                            | (p=0.07)          | (p=0.06)          |      | (p=0.001)           | (p<0.001)         |        |
| FLI                                        | -10.6±9.0 (17)    | -5.3±11.4 (13)    | 0.16 | -8.7±13.3 (159)     | -3.5±15.8 (140)   | 0.002  |
|                                            | (p<0.001)         | (p=0.12)          |      | (p<0.001)           | (p=0.009)         |        |
| FIB-4 index (log-transformed)              | 0.01±0.24 (26)    | 0.05±0.26 (21)    | 0.63 | 0.03±0.25 (228)     | 0.08±0.26 (226)   | 0.048  |
|                                            | (p=0.82)          | (p=0.43)          |      | (p=0.07)            | (p<0.001)         |        |

Data are presented as mean ± standard deviation (n).

Two-sample t-tests were performed for between-group comparisons and one-sample t-tests for within-group comparisons.

\* Percentage change was calculated instead of change.

DPP-4i, dipeptidyl-peptidase 4 inhibitor; HbA1c, hemoglobin A1c; eGFR, estimated glomerular filtration rate; HDL-cholesterol, high-density lipoprotein cholesterol; T-chol, total cholesterol; LDL-cholesterol, low-density lipoprotein cholesterol; TG, triglyceride; AST, aspartate aminotransferase; ALT, alanine aminotransferase;  $\gamma$ -GTP, gamma-glutamyl transpeptidase; Amy, amylase; FLI, fatty liver index; FIB-4 index: fibrosis-4 index.

**Table S10.** Adverse events

|                                               | Luseogliflozin group |         | DPP-4i group |         |
|-----------------------------------------------|----------------------|---------|--------------|---------|
| Number of patients in the safety analysis set | 300                  |         | 299          |         |
| Death                                         | 0 (0.0)              |         | 0 (0.0)      |         |
| Any adverse event                             | 56 (18.7)            |         | 52 (17.4)    |         |
| Any serious adverse event                     | 10 (3.3)             |         | 5 (1.7)      |         |
| Name of adverse event                         | total                | serious | total        | serious |
| genital pruritus                              | 6 (2.0)              | 0 (0.0) | 0 (0.0)      | 0 (0.0) |
| hepatic dysfunction                           | 5 (1.7)              | 0 (0.0) | 2 (0.7)      | 0 (0.0) |
| dyslipidemia                                  | 5 (1.7)              | 0 (0.0) | 1 (0.3)      | 0 (0.0) |
| cystitis                                      | 5 (1.7)              | 0 (0.0) | 0 (0.0)      | 0 (0.0) |
| hyperglycemia                                 | 4 (1.3)              | 0 (0.0) | 7 (2.3)      | 0 (0.0) |
| upper respiratory tract infection             | 4 (1.3)              | 0 (0.0) | 10 (3.3)     | 0 (0.0) |
| pancreatic cancer                             | 3 (1.0)              | 3 (1.0) | 0 (0.0)      | 0 (0.0) |
| frequent urination                            | 3 (1.0)              | 0 (0.0) | 0 (0.0)      | 0 (0.0) |
| increased red blood cells                     | 3 (1.0)              | 0 (0.0) | 0 (0.0)      | 0 (0.0) |
| hypertension                                  | 2 (0.7)              | 0 (0.0) | 2 (0.7)      | 0 (0.0) |
| hyperuricemia                                 | 2 (0.7)              | 0 (0.0) | 2 (0.7)      | 0 (0.0) |
| peripheral arterial occlusive disease         | 1 (0.3)              | 1 (0.3) | 1 (0.3)      | 1 (0.3) |
| acute cholangitis                             | 1 (0.3)              | 1 (0.3) | 0 (0.0)      | 0 (0.0) |
| inguinal hernia                               | 1 (0.3)              | 1 (0.3) | 0 (0.0)      | 0 (0.0) |
| myocardial infarction                         | 1 (0.3)              | 1 (0.3) | 0 (0.0)      | 0 (0.0) |
| pyelonephritis                                | 1 (0.3)              | 1 (0.3) | 0 (0.0)      | 0 (0.0) |
| trigeminal neuralgia                          | 1 (0.3)              | 1 (0.3) | 0 (0.0)      | 0 (0.0) |
| urosepsis                                     | 1 (0.3)              | 1 (0.3) | 0 (0.0)      | 0 (0.0) |
| uterine leiomyoma                             | 1 (0.3)              | 1 (0.3) | 0 (0.0)      | 0 (0.0) |
| hypoglycemia                                  | 1 (0.3)              | 0 (0.0) | 3 (1.0)      | 0 (0.0) |

|                      |         |         |         |         |
|----------------------|---------|---------|---------|---------|
| bronchitis           | 1 (0.3) | 0 (0.0) | 1 (0.3) | 0 (0.0) |
| hypotension          | 1 (0.3) | 0 (0.0) | 1 (0.3) | 0 (0.0) |
| influenza            | 1 (0.3) | 0 (0.0) | 1 (0.3) | 0 (0.0) |
| insomnia             | 1 (0.3) | 0 (0.0) | 1 (0.3) | 0 (0.0) |
| rash                 | 1 (0.3) | 0 (0.0) | 1 (0.3) | 0 (0.0) |
| bacterial vaginosis  | 1 (0.3) | 0 (0.0) | 0 (0.0) | 0 (0.0) |
| balanoposthitis      | 1 (0.3) | 0 (0.0) | 0 (0.0) | 0 (0.0) |
| diabetic retinopathy | 1 (0.3) | 0 (0.0) | 0 (0.0) | 0 (0.0) |
| diarrhea             | 1 (0.3) | 0 (0.0) | 0 (0.0) | 0 (0.0) |
| fever                | 1 (0.3) | 0 (0.0) | 0 (0.0) | 0 (0.0) |
| foot fracture        | 1 (0.3) | 0 (0.0) | 0 (0.0) | 0 (0.0) |
| hematuria            | 1 (0.3) | 0 (0.0) | 0 (0.0) | 0 (0.0) |
| increased hematocrit | 1 (0.3) | 0 (0.0) | 0 (0.0) | 0 (0.0) |
| injury               | 1 (0.3) | 0 (0.0) | 0 (0.0) | 0 (0.0) |
| macrocytic anemia    | 1 (0.3) | 0 (0.0) | 0 (0.0) | 0 (0.0) |
| parotitis            | 1 (0.3) | 0 (0.0) | 0 (0.0) | 0 (0.0) |
| periodontal disease  | 1 (0.3) | 0 (0.0) | 0 (0.0) | 0 (0.0) |
| thirst               | 1 (0.3) | 0 (0.0) | 0 (0.0) | 0 (0.0) |
| thrombophlebitis     | 1 (0.3) | 0 (0.0) | 0 (0.0) | 0 (0.0) |
| urethritis           | 1 (0.3) | 0 (0.0) | 0 (0.0) | 0 (0.0) |
| vertigo              | 1 (0.3) | 0 (0.0) | 0 (0.0) | 0 (0.0) |
| constipation         | 0 (0.0) | 0 (0.0) | 3 (1.0) | 0 (0.0) |
| atrial flutter       | 0 (0.0) | 0 (0.0) | 1 (0.3) | 1 (0.3) |
| bacterial pneumonia  | 0 (0.0) | 0 (0.0) | 1 (0.3) | 1 (0.3) |
| pancreatitis         | 0 (0.0) | 0 (0.0) | 1 (0.3) | 1 (0.3) |
| uterine cancer       | 0 (0.0) | 0 (0.0) | 1 (0.3) | 1 (0.3) |
| asteatotic eczema    | 0 (0.0) | 0 (0.0) | 1 (0.3) | 0 (0.0) |

|                                 |         |         |         |         |
|---------------------------------|---------|---------|---------|---------|
| back pain                       | 0 (0.0) | 0 (0.0) | 1 (0.3) | 0 (0.0) |
| diabetic nephropathy            | 0 (0.0) | 0 (0.0) | 1 (0.3) | 0 (0.0) |
| disc protrusion                 | 0 (0.0) | 0 (0.0) | 1 (0.3) | 0 (0.0) |
| drug eruption                   | 0 (0.0) | 0 (0.0) | 1 (0.3) | 0 (0.0) |
| gastroesophageal reflux disease | 0 (0.0) | 0 (0.0) | 1 (0.3) | 0 (0.0) |
| headache                        | 0 (0.0) | 0 (0.0) | 1 (0.3) | 0 (0.0) |
| hypesthesia                     | 0 (0.0) | 0 (0.0) | 1 (0.3) | 0 (0.0) |
| increased blood triglyceride    | 0 (0.0) | 0 (0.0) | 1 (0.3) | 0 (0.0) |
| increased NT-proBNP             | 0 (0.0) | 0 (0.0) | 1 (0.3) | 0 (0.0) |
| increased pancreatic enzyme     | 0 (0.0) | 0 (0.0) | 1 (0.3) | 0 (0.0) |
| increased platelet count        | 0 (0.0) | 0 (0.0) | 1 (0.3) | 0 (0.0) |
| joint injury                    | 0 (0.0) | 0 (0.0) | 1 (0.3) | 0 (0.0) |
| joint pain                      | 0 (0.0) | 0 (0.0) | 1 (0.3) | 0 (0.0) |
| lymph node metastasis           | 0 (0.0) | 0 (0.0) | 1 (0.3) | 0 (0.0) |
| malaise                         | 0 (0.0) | 0 (0.0) | 1 (0.3) | 0 (0.0) |
| myalgia                         | 0 (0.0) | 0 (0.0) | 1 (0.3) | 0 (0.0) |
| optic disc cupping              | 0 (0.0) | 0 (0.0) | 1 (0.3) | 0 (0.0) |
| pityriasis rosea                | 0 (0.0) | 0 (0.0) | 1 (0.3) | 0 (0.0) |
| psoriasis                       | 0 (0.0) | 0 (0.0) | 1 (0.3) | 0 (0.0) |
| spondylolisthesis               | 0 (0.0) | 0 (0.0) | 1 (0.3) | 0 (0.0) |
| urolithiasis                    | 0 (0.0) | 0 (0.0) | 1 (0.3) | 0 (0.0) |
| zinc deficiency                 | 0 (0.0) | 0 (0.0) | 1 (0.3) | 0 (0.0) |

---

Data are represented as n (%).

DPP-4i, dipeptidyl-peptidase 4 inhibitor; NT-proBNP, amino-terminal pro-brain natriuretic peptide



**Table S11.** Adverse events stratified by baseline BMI

|                                               | BMI < 25kg/m <sup>2</sup> |         |              |         | BMI ≥ 25kg/m <sup>2</sup> |         |              |         |
|-----------------------------------------------|---------------------------|---------|--------------|---------|---------------------------|---------|--------------|---------|
|                                               | Luseogliflozin            |         | DPP-4i group |         | Luseogliflozin            |         | DPP-4i group |         |
|                                               | group                     |         | group        |         | group                     |         | group        |         |
| Number of patients in the safety analysis set | 94                        |         | 93           |         | 203                       |         | 203          |         |
| Death                                         | 0 (0.0)                   |         | 0 (0.0)      |         | 0 (0.0)                   |         | 0 (0.0)      |         |
| Any adverse event                             | 15 (16.0)                 |         | 14 (15.1)    |         | 41 (20.2)                 |         | 36 (17.7)    |         |
| Any serious adverse event                     | 4 (4.3)                   |         | 1 (1.1)      |         | 6 (3.0)                   |         | 4 (2.0)      |         |
| Name of adverse event                         | total                     | serious | total        | serious | total                     | serious | total        | serious |
| upper respiratory tract infection             | 2 (2.1)                   | 0 (0.0) | 3 (3.2)      | 0 (0.0) | 2 (1.0)                   | 0 (0.0) | 7 (3.4)      | 0 (0.0) |
| cystitis                                      | 1 (1.1)                   | 0 (0.0) | 0 (0.0)      | 0 (0.0) | 4 (2.0)                   | 0 (0.0) | 0 (0.0)      | 0 (0.0) |
| dyslipidemia                                  | 1 (1.1)                   | 0 (0.0) | 0 (0.0)      | 0 (0.0) | 4 (2.0)                   | 0 (0.0) | 0 (0.0)      | 0 (0.0) |
| pancreatic cancer                             | 1 (1.1)                   | 1 (1.1) | 0 (0.0)      | 0 (0.0) | 2 (1.0)                   | 2 (1.0) | 0 (0.0)      | 0 (0.0) |
| increased red blood cells                     | 1 (1.1)                   | 0 (0.0) | 0 (0.0)      | 0 (0.0) | 2 (1.0)                   | 0 (0.0) | 0 (0.0)      | 0 (0.0) |
| hypertension                                  | 1 (1.1)                   | 0 (0.0) | 0 (0.0)      | 0 (0.0) | 1 (0.5)                   | 0 (0.0) | 1 (0.5)      | 0 (0.0) |
| hyperuricemia                                 | 1 (1.1)                   | 0 (0.0) | 1 (1.1)      | 0 (0.0) | 1 (0.5)                   | 0 (0.0) | 1 (0.5)      | 0 (0.0) |
| acute cholangitis                             | 1 (1.1)                   | 1 (1.1) | 0 (0.0)      | 0 (0.0) | 0 (0.0)                   | 0 (0.0) | 0 (0.0)      | 0 (0.0) |
| peripheral arterial occlusive disease         | 1 (1.1)                   | 1 (1.1) | 1 (1.1)      | 1 (1.1) | 0 (0.0)                   | 0 (0.0) | 0 (0.0)      | 0 (0.0) |
| trigeminal neuralgia                          | 1 (1.1)                   | 1 (1.1) | 0 (0.0)      | 0 (0.0) | 0 (0.0)                   | 0 (0.0) | 0 (0.0)      | 0 (0.0) |
| balanoposthitis                               | 1 (1.1)                   | 0 (0.0) | 0 (0.0)      | 0 (0.0) | 0 (0.0)                   | 0 (0.0) | 0 (0.0)      | 0 (0.0) |
| bronchitis                                    | 1 (1.1)                   | 0 (0.0) | 1 (1.1)      | 0 (0.0) | 0 (0.0)                   | 0 (0.0) | 0 (0.0)      | 0 (0.0) |
| hematuria                                     | 1 (1.1)                   | 0 (0.0) | 0 (0.0)      | 0 (0.0) | 0 (0.0)                   | 0 (0.0) | 0 (0.0)      | 0 (0.0) |
| hypotension                                   | 1 (1.1)                   | 0 (0.0) | 0 (0.0)      | 0 (0.0) | 0 (0.0)                   | 0 (0.0) | 1 (0.5)      | 0 (0.0) |
| injury                                        | 1 (1.1)                   | 0 (0.0) | 0 (0.0)      | 0 (0.0) | 0 (0.0)                   | 0 (0.0) | 0 (0.0)      | 0 (0.0) |
| macrocytic anemia                             | 1 (1.1)                   | 0 (0.0) | 0 (0.0)      | 0 (0.0) | 0 (0.0)                   | 0 (0.0) | 0 (0.0)      | 0 (0.0) |
| parotitis                                     | 1 (1.1)                   | 0 (0.0) | 0 (0.0)      | 0 (0.0) | 0 (0.0)                   | 0 (0.0) | 0 (0.0)      | 0 (0.0) |

|                       |         |         |         |         |         |         |         |         |
|-----------------------|---------|---------|---------|---------|---------|---------|---------|---------|
| thirst                | 1 (1.1) | 0 (0.0) | 0 (0.0) | 0 (0.0) | 0 (0.0) | 0 (0.0) | 0 (0.0) | 0 (0.0) |
| vertigo               | 1 (1.1) | 0 (0.0) | 0 (0.0) | 0 (0.0) | 0 (0.0) | 0 (0.0) | 0 (0.0) | 0 (0.0) |
| genital pruritus      | 0 (0.0) | 0 (0.0) | 0 (0.0) | 0 (0.0) | 6 (3.0) | 0 (0.0) | 0 (0.0) | 0 (0.0) |
| hepatic dysfunction   | 0 (0.0) | 0 (0.0) | 0 (0.0) | 0 (0.0) | 5 (2.5) | 0 (0.0) | 1 (0.5) | 0 (0.0) |
| hyperglycemia         | 0 (0.0) | 0 (0.0) | 1 (1.1) | 0 (0.0) | 4 (2.0) | 0 (0.0) | 6 (3.0) | 0 (0.0) |
| frequent urination    | 0 (0.0) | 0 (0.0) | 0 (0.0) | 0 (0.0) | 3 (1.5) | 0 (0.0) | 0 (0.0) | 0 (0.0) |
| inguinal hernia       | 0 (0.0) | 0 (0.0) | 0 (0.0) | 0 (0.0) | 1 (0.5) | 1 (0.5) | 0 (0.0) | 0 (0.0) |
| myocardial infarction | 0 (0.0) | 0 (0.0) | 0 (0.0) | 0 (0.0) | 1 (0.5) | 1 (0.5) | 0 (0.0) | 0 (0.0) |
| pyelonephritis        | 0 (0.0) | 0 (0.0) | 0 (0.0) | 0 (0.0) | 1 (0.5) | 1 (0.5) | 0 (0.0) | 0 (0.0) |
| urosepsis             | 0 (0.0) | 0 (0.0) | 0 (0.0) | 0 (0.0) | 1 (0.5) | 1 (0.5) | 0 (0.0) | 0 (0.0) |
| uterine leiomyoma     | 0 (0.0) | 0 (0.0) | 0 (0.0) | 0 (0.0) | 1 (0.5) | 1 (0.5) | 0 (0.0) | 0 (0.0) |
| bacterial vaginosis   | 0 (0.0) | 0 (0.0) | 0 (0.0) | 0 (0.0) | 1 (0.5) | 0 (0.0) | 0 (0.0) | 0 (0.0) |
| diabetic retinopathy  | 0 (0.0) | 0 (0.0) | 0 (0.0) | 0 (0.0) | 1 (0.5) | 0 (0.0) | 0 (0.0) | 0 (0.0) |
| diarrhea              | 0 (0.0) | 0 (0.0) | 0 (0.0) | 0 (0.0) | 1 (0.5) | 0 (0.0) | 0 (0.0) | 0 (0.0) |
| fever                 | 0 (0.0) | 0 (0.0) | 0 (0.0) | 0 (0.0) | 1 (0.5) | 0 (0.0) | 0 (0.0) | 0 (0.0) |
| foot fracture         | 0 (0.0) | 0 (0.0) | 0 (0.0) | 0 (0.0) | 1 (0.5) | 0 (0.0) | 0 (0.0) | 0 (0.0) |
| hypoglycemia          | 0 (0.0) | 0 (0.0) | 0 (0.0) | 0 (0.0) | 1 (0.5) | 0 (0.0) | 3 (1.5) | 0 (0.0) |
| increased hematocrit  | 0 (0.0) | 0 (0.0) | 0 (0.0) | 0 (0.0) | 1 (0.5) | 0 (0.0) | 0 (0.0) | 0 (0.0) |
| influenza             | 0 (0.0) | 0 (0.0) | 0 (0.0) | 0 (0.0) | 1 (0.5) | 0 (0.0) | 0 (0.0) | 0 (0.0) |
| insomnia              | 0 (0.0) | 0 (0.0) | 0 (0.0) | 0 (0.0) | 1 (0.5) | 0 (0.0) | 1 (0.5) | 0 (0.0) |
| periodontal disease   | 0 (0.0) | 0 (0.0) | 0 (0.0) | 0 (0.0) | 1 (0.5) | 0 (0.0) | 0 (0.0) | 0 (0.0) |
| rash                  | 0 (0.0) | 0 (0.0) | 0 (0.0) | 0 (0.0) | 1 (0.5) | 0 (0.0) | 1 (0.5) | 0 (0.0) |
| thrombophlebitis      | 0 (0.0) | 0 (0.0) | 0 (0.0) | 0 (0.0) | 1 (0.5) | 0 (0.0) | 0 (0.0) | 0 (0.0) |
| urethritis            | 0 (0.0) | 0 (0.0) | 0 (0.0) | 0 (0.0) | 1 (0.5) | 0 (0.0) | 0 (0.0) | 0 (0.0) |
| asteatotic eczema     | 0 (0.0) | 0 (0.0) | 0 (0.0) | 0 (0.0) | 0 (0.0) | 0 (0.0) | 1 (0.5) | 0 (0.0) |
| atrial flutter        | 0 (0.0) | 0 (0.0) | 0 (0.0) | 0 (0.0) | 0 (0.0) | 0 (0.0) | 1 (0.5) | 1 (0.5) |
| back pain             | 0 (0.0) | 0 (0.0) | 0 (0.0) | 0 (0.0) | 0 (0.0) | 0 (0.0) | 1 (0.5) | 0 (0.0) |

|                                 |         |         |         |         |         |         |         |         |
|---------------------------------|---------|---------|---------|---------|---------|---------|---------|---------|
| bacterial pneumonia             | 0 (0.0) | 0 (0.0) | 0 (0.0) | 0 (0.0) | 0 (0.0) | 0 (0.0) | 1 (0.5) | 1 (0.5) |
| constipation                    | 0 (0.0) | 0 (0.0) | 1 (1.1) | 0 (0.0) | 0 (0.0) | 0 (0.0) | 2 (1.0) | 0 (0.0) |
| diabetic nephropathy            | 0 (0.0) | 0 (0.0) | 0 (0.0) | 0 (0.0) | 0 (0.0) | 0 (0.0) | 1 (0.5) | 0 (0.0) |
| disc protrusion                 | 0 (0.0) | 0 (0.0) | 1 (1.1) | 0 (0.0) | 0 (0.0) | 0 (0.0) | 0 (0.0) | 0 (0.0) |
| drug eruption                   | 0 (0.0) | 0 (0.0) | 1 (1.1) | 0 (0.0) | 0 (0.0) | 0 (0.0) | 0 (0.0) | 0 (0.0) |
| gastroesophageal reflux disease | 0 (0.0) | 0 (0.0) | 1 (1.1) | 0 (0.0) | 0 (0.0) | 0 (0.0) | 0 (0.0) | 0 (0.0) |
| headache                        | 0 (0.0) | 0 (0.0) | 0 (0.0) | 0 (0.0) | 0 (0.0) | 0 (0.0) | 1 (0.5) | 0 (0.0) |
| hepatic dysfunction             | 0 (0.0) | 0 (0.0) | 1 (1.1) | 0 (0.0) | 0 (0.0) | 0 (0.0) | 0 (0.0) | 0 (0.0) |
| hypesthesia                     | 0 (0.0) | 0 (0.0) | 0 (0.0) | 0 (0.0) | 0 (0.0) | 0 (0.0) | 1 (0.5) | 0 (0.0) |
| increased blood triglyceride    | 0 (0.0) | 0 (0.0) | 0 (0.0) | 0 (0.0) | 0 (0.0) | 0 (0.0) | 1 (0.5) | 0 (0.0) |
| increased NT-proBNP             | 0 (0.0) | 0 (0.0) | 0 (0.0) | 0 (0.0) | 0 (0.0) | 0 (0.0) | 1 (0.5) | 0 (0.0) |
| increased pancreatic enzyme     | 0 (0.0) | 0 (0.0) | 0 (0.0) | 0 (0.0) | 0 (0.0) | 0 (0.0) | 1 (0.5) | 0 (0.0) |
| increased platelet count        | 0 (0.0) | 0 (0.0) | 1 (1.1) | 0 (0.0) | 0 (0.0) | 0 (0.0) | 0 (0.0) | 0 (0.0) |
| joint injury                    | 0 (0.0) | 0 (0.0) | 0 (0.0) | 0 (0.0) | 0 (0.0) | 0 (0.0) | 1 (0.5) | 0 (0.0) |
| joint pain                      | 0 (0.0) | 0 (0.0) | 1 (1.1) | 0 (0.0) | 0 (0.0) | 0 (0.0) | 0 (0.0) | 0 (0.0) |
| lymph node metastasis           | 0 (0.0) | 0 (0.0) | 0 (0.0) | 0 (0.0) | 0 (0.0) | 0 (0.0) | 1 (0.5) | 0 (0.0) |
| malaise                         | 0 (0.0) | 0 (0.0) | 0 (0.0) | 0 (0.0) | 0 (0.0) | 0 (0.0) | 1 (0.5) | 0 (0.0) |
| myalgia                         | 0 (0.0) | 0 (0.0) | 1 (1.1) | 0 (0.0) | 0 (0.0) | 0 (0.0) | 0 (0.0) | 0 (0.0) |
| optic disc cupping              | 0 (0.0) | 0 (0.0) | 0 (0.0) | 0 (0.0) | 0 (0.0) | 0 (0.0) | 1 (0.5) | 0 (0.0) |
| pancreatitis                    | 0 (0.0) | 0 (0.0) | 0 (0.0) | 0 (0.0) | 0 (0.0) | 0 (0.0) | 1 (0.5) | 1 (0.5) |
| pityriasis rosea                | 0 (0.0) | 0 (0.0) | 0 (0.0) | 0 (0.0) | 0 (0.0) | 0 (0.0) | 1 (0.5) | 0 (0.0) |
| psoriasis                       | 0 (0.0) | 0 (0.0) | 0 (0.0) | 0 (0.0) | 0 (0.0) | 0 (0.0) | 1 (0.5) | 0 (0.0) |
| spondylolisthesis               | 0 (0.0) | 0 (0.0) | 0 (0.0) | 0 (0.0) | 0 (0.0) | 0 (0.0) | 1 (0.5) | 0 (0.0) |
| urolithiasis                    | 0 (0.0) | 0 (0.0) | 0 (0.0) | 0 (0.0) | 0 (0.0) | 0 (0.0) | 1 (0.5) | 0 (0.0) |
| uterine cancer                  | 0 (0.0) | 0 (0.0) | 0 (0.0) | 0 (0.0) | 0 (0.0) | 0 (0.0) | 1 (0.5) | 1 (0.5) |
| zinc deficiency                 | 0 (0.0) | 0 (0.0) | 0 (0.0) | 0 (0.0) | 0 (0.0) | 0 (0.0) | 1 (0.5) | 0 (0.0) |

Data are represented as n (%).

DPP-4i, dipeptidyl-peptidase 4 inhibitor; NT-proBNP, amino-terminal pro-brain natriuretic peptide

**Table S12.** Adverse events stratified by baseline age

|                                               | Age < 65 years |         |              |         | Age ≥ 65 years |         |              |         |
|-----------------------------------------------|----------------|---------|--------------|---------|----------------|---------|--------------|---------|
|                                               | Luseogliflozin |         | DPP-4i group |         | Luseogliflozin |         | DPP-4i group |         |
|                                               | group          |         | group        |         | group          |         | group        |         |
| Number of patients in the safety analysis set | 206            |         | 205          |         | 94             |         | 94           |         |
| Death                                         | 0 (0.0)        |         | 0 (0.0)      |         | 0 (0.0)        |         | 0 (0.0)      |         |
| Any adverse event                             | 47 (22.8)      |         | 37 (18.0)    |         | 9 (9.6)        |         | 15 (16.0)    |         |
| Any serious adverse event                     | 8 (3.9)        |         | 4 (2.0)      |         | 2 (2.1)        |         | 1 (1.1)      |         |
| Name of adverse event                         | total          | serious | total        | serious | total          | serious | total        | serious |
| genital pruritus                              | 5 (2.4)        | 0 (0.0) | 0 (0.0)      | 0 (0.0) | 1 (1.1)        | 0 (0.0) | 0 (0.0)      | 0 (0.0) |
| cystitis                                      | 4 (1.9)        | 0 (0.0) | 0 (0.0)      | 0 (0.0) | 1 (1.1)        | 0 (0.0) | 0 (0.0)      | 0 (0.0) |
| dyslipidemia                                  | 4 (1.9)        | 0 (0.0) | 0 (0.0)      | 0 (0.0) | 1 (1.1)        | 0 (0.0) | 1 (1.1)      | 0 (0.0) |
| hepatic dysfunction                           | 4 (1.9)        | 0 (0.0) | 1 (0.5)      | 0 (0.0) | 0 (0.0)        | 0 (0.0) | 0 (0.0)      | 0 (0.0) |
| hyperglycemia                                 | 4 (1.9)        | 0 (0.0) | 6 (2.9)      | 0 (0.0) | 0 (0.0)        | 0 (0.0) | 1 (1.1)      | 0 (0.0) |
| upper respiratory tract infection             | 4 (1.9)        | 0 (0.0) | 8 (3.9)      | 0 (0.0) | 0 (0.0)        | 0 (0.0) | 2 (2.1)      | 0 (0.0) |
| increased red blood cells                     | 3 (1.5)        | 0 (0.0) | 0 (0.0)      | 0 (0.0) | 0 (0.0)        | 0 (0.0) | 0 (0.0)      | 0 (0.0) |
| frequent urination                            | 2 (1.0)        | 0 (0.0) | 0 (0.0)      | 0 (0.0) | 1 (1.1)        | 0 (0.0) | 0 (0.0)      | 0 (0.0) |
| hypertension                                  | 2 (1.0)        | 0 (0.0) | 2 (1.0)      | 0 (0.0) | 0 (0.0)        | 0 (0.0) | 0 (0.0)      | 0 (0.0) |
| hyperuricemia                                 | 2 (1.0)        | 0 (0.0) | 2 (1.0)      | 0 (0.0) | 0 (0.0)        | 0 (0.0) | 0 (0.0)      | 0 (0.0) |
| pancreatic cancer                             | 1 (0.5)        | 1 (0.5) | 0 (0.0)      | 0 (0.0) | 2 (2.1)        | 2 (2.1) | 0 (0.0)      | 0 (0.0) |
| acute cholangitis                             | 1 (0.5)        | 1 (0.5) | 0 (0.0)      | 0 (0.0) | 0 (0.0)        | 0 (0.0) | 0 (0.0)      | 0 (0.0) |
| inguinal hernia                               | 1 (0.5)        | 1 (0.5) | 0 (0.0)      | 0 (0.0) | 0 (0.0)        | 0 (0.0) | 0 (0.0)      | 0 (0.0) |
| myocardial infarction                         | 1 (0.5)        | 1 (0.5) | 0 (0.0)      | 0 (0.0) | 0 (0.0)        | 0 (0.0) | 0 (0.0)      | 0 (0.0) |
| peripheral arterial occlusive disease         | 1 (0.5)        | 1 (0.5) | 0 (0.0)      | 0 (0.0) | 0 (0.0)        | 0 (0.0) | 1 (1.1)      | 1 (1.1) |
| pyelonephritis                                | 1 (0.5)        | 1 (0.5) | 0 (0.0)      | 0 (0.0) | 0 (0.0)        | 0 (0.0) | 0 (0.0)      | 0 (0.0) |
| trigeminal neuralgia                          | 1 (0.5)        | 1 (0.5) | 0 (0.0)      | 0 (0.0) | 0 (0.0)        | 0 (0.0) | 0 (0.0)      | 0 (0.0) |

|                      |         |         |         |         |         |         |         |         |
|----------------------|---------|---------|---------|---------|---------|---------|---------|---------|
| urosepsis            | 1 (0.5) | 1 (0.5) | 0 (0.0) | 0 (0.0) | 0 (0.0) | 0 (0.0) | 0 (0.0) | 0 (0.0) |
| uterine leiomyoma    | 1 (0.5) | 1 (0.5) | 0 (0.0) | 0 (0.0) | 0 (0.0) | 0 (0.0) | 0 (0.0) | 0 (0.0) |
| bacterial vaginosis  | 1 (0.5) | 0 (0.0) | 0 (0.0) | 0 (0.0) | 0 (0.0) | 0 (0.0) | 0 (0.0) | 0 (0.0) |
| balanoposthitis      | 1 (0.5) | 0 (0.0) | 0 (0.0) | 0 (0.0) | 0 (0.0) | 0 (0.0) | 0 (0.0) | 0 (0.0) |
| bronchitis           | 1 (0.5) | 0 (0.0) | 0 (0.0) | 0 (0.0) | 0 (0.0) | 0 (0.0) | 1 (1.1) | 0 (0.0) |
| diabetic retinopathy | 1 (0.5) | 0 (0.0) | 0 (0.0) | 0 (0.0) | 0 (0.0) | 0 (0.0) | 0 (0.0) | 0 (0.0) |
| diarrhea             | 1 (0.5) | 0 (0.0) | 0 (0.0) | 0 (0.0) | 0 (0.0) | 0 (0.0) | 0 (0.0) | 0 (0.0) |
| fever                | 1 (0.5) | 0 (0.0) | 0 (0.0) | 0 (0.0) | 0 (0.0) | 0 (0.0) | 0 (0.0) | 0 (0.0) |
| foot fracture        | 1 (0.5) | 0 (0.0) | 0 (0.0) | 0 (0.0) | 0 (0.0) | 0 (0.0) | 0 (0.0) | 0 (0.0) |
| hypoglycemia         | 1 (0.5) | 0 (0.0) | 3 (1.5) | 0 (0.0) | 0 (0.0) | 0 (0.0) | 0 (0.0) | 0 (0.0) |
| hypotension          | 1 (0.5) | 0 (0.0) | 0 (0.0) | 0 (0.0) | 0 (0.0) | 0 (0.0) | 1 (1.1) | 0 (0.0) |
| increased hematocrit | 1 (0.5) | 0 (0.0) | 0 (0.0) | 0 (0.0) | 0 (0.0) | 0 (0.0) | 0 (0.0) | 0 (0.0) |
| influenza            | 1 (0.5) | 0 (0.0) | 1 (0.5) | 0 (0.0) | 0 (0.0) | 0 (0.0) | 0 (0.0) | 0 (0.0) |
| injury               | 1 (0.5) | 0 (0.0) | 0 (0.0) | 0 (0.0) | 0 (0.0) | 0 (0.0) | 0 (0.0) | 0 (0.0) |
| parotitis            | 1 (0.5) | 0 (0.0) | 0 (0.0) | 0 (0.0) | 0 (0.0) | 0 (0.0) | 0 (0.0) | 0 (0.0) |
| periodontal disease  | 1 (0.5) | 0 (0.0) | 0 (0.0) | 0 (0.0) | 0 (0.0) | 0 (0.0) | 0 (0.0) | 0 (0.0) |
| thrombophlebitis     | 1 (0.5) | 0 (0.0) | 0 (0.0) | 0 (0.0) | 0 (0.0) | 0 (0.0) | 0 (0.0) | 0 (0.0) |
| urethritis           | 1 (0.5) | 0 (0.0) | 0 (0.0) | 0 (0.0) | 0 (0.0) | 0 (0.0) | 0 (0.0) | 0 (0.0) |
| vertigo              | 1 (0.5) | 0 (0.0) | 0 (0.0) | 0 (0.0) | 0 (0.0) | 0 (0.0) | 0 (0.0) | 0 (0.0) |
| hematuria            | 0 (0.0) | 0 (0.0) | 0 (0.0) | 0 (0.0) | 1 (1.1) | 0 (0.0) | 0 (0.0) | 0 (0.0) |
| hepatic dysfunction  | 0 (0.0) | 0 (0.0) | 0 (0.0) | 0 (0.0) | 1 (1.1) | 0 (0.0) | 1 (1.1) | 0 (0.0) |
| insomnia             | 0 (0.0) | 0 (0.0) | 1 (0.5) | 0 (0.0) | 1 (1.1) | 0 (0.0) | 0 (0.0) | 0 (0.0) |
| macrocytic anemia    | 0 (0.0) | 0 (0.0) | 0 (0.0) | 0 (0.0) | 1 (1.1) | 0 (0.0) | 0 (0.0) | 0 (0.0) |
| rash                 | 0 (0.0) | 0 (0.0) | 1 (0.5) | 0 (0.0) | 1 (1.1) | 0 (0.0) | 0 (0.0) | 0 (0.0) |
| thirst               | 0 (0.0) | 0 (0.0) | 0 (0.0) | 0 (0.0) | 1 (1.1) | 0 (0.0) | 0 (0.0) | 0 (0.0) |
| asteatotic eczema    | 0 (0.0) | 0 (0.0) | 1 (0.5) | 0 (0.0) | 0 (0.0) | 0 (0.0) | 0 (0.0) | 0 (0.0) |
| atrial flutter       | 0 (0.0) | 0 (0.0) | 1 (0.5) | 1 (0.5) | 0 (0.0) | 0 (0.0) | 0 (0.0) | 0 (0.0) |

|                                 |         |         |         |         |         |         |         |         |
|---------------------------------|---------|---------|---------|---------|---------|---------|---------|---------|
| back pain                       | 0 (0.0) | 0 (0.0) | 0 (0.0) | 0 (0.0) | 0 (0.0) | 0 (0.0) | 1 (1.1) | 0 (0.0) |
| bacterial pneumonia             | 0 (0.0) | 0 (0.0) | 1 (0.5) | 1 (0.5) | 0 (0.0) | 0 (0.0) | 0 (0.0) | 0 (0.0) |
| constipation                    | 0 (0.0) | 0 (0.0) | 2 (1.0) | 0 (0.0) | 0 (0.0) | 0 (0.0) | 1 (1.1) | 0 (0.0) |
| diabetic nephropathy            | 0 (0.0) | 0 (0.0) | 1 (0.5) | 0 (0.0) | 0 (0.0) | 0 (0.0) | 0 (0.0) | 0 (0.0) |
| disc protrusion                 | 0 (0.0) | 0 (0.0) | 1 (0.5) | 0 (0.0) | 0 (0.0) | 0 (0.0) | 0 (0.0) | 0 (0.0) |
| drug eruption                   | 0 (0.0) | 0 (0.0) | 1 (0.5) | 0 (0.0) | 0 (0.0) | 0 (0.0) | 0 (0.0) | 0 (0.0) |
| gastroesophageal reflux disease | 0 (0.0) | 0 (0.0) | 1 (0.5) | 0 (0.0) | 0 (0.0) | 0 (0.0) | 0 (0.0) | 0 (0.0) |
| headache                        | 0 (0.0) | 0 (0.0) | 0 (0.0) | 0 (0.0) | 0 (0.0) | 0 (0.0) | 1 (1.1) | 0 (0.0) |
| hypesthesia                     | 0 (0.0) | 0 (0.0) | 1 (0.5) | 0 (0.0) | 0 (0.0) | 0 (0.0) | 0 (0.0) | 0 (0.0) |
| increased blood triglyceride    | 0 (0.0) | 0 (0.0) | 1 (0.5) | 0 (0.0) | 0 (0.0) | 0 (0.0) | 0 (0.0) | 0 (0.0) |
| increased NT-proBNP             | 0 (0.0) | 0 (0.0) | 1 (0.5) | 0 (0.0) | 0 (0.0) | 0 (0.0) | 0 (0.0) | 0 (0.0) |
| increased pancreatic enzyme     | 0 (0.0) | 0 (0.0) | 0 (0.0) | 0 (0.0) | 0 (0.0) | 0 (0.0) | 1 (1.1) | 0 (0.0) |
| increased platelet count        | 0 (0.0) | 0 (0.0) | 0 (0.0) | 0 (0.0) | 0 (0.0) | 0 (0.0) | 1 (1.1) | 0 (0.0) |
| joint injury                    | 0 (0.0) | 0 (0.0) | 1 (0.5) | 0 (0.0) | 0 (0.0) | 0 (0.0) | 0 (0.0) | 0 (0.0) |
| joint pain                      | 0 (0.0) | 0 (0.0) | 1 (0.5) | 0 (0.0) | 0 (0.0) | 0 (0.0) | 0 (0.0) | 0 (0.0) |
| lymph node metastasis           | 0 (0.0) | 0 (0.0) | 1 (0.5) | 0 (0.0) | 0 (0.0) | 0 (0.0) | 0 (0.0) | 0 (0.0) |
| malaise                         | 0 (0.0) | 0 (0.0) | 1 (0.5) | 0 (0.0) | 0 (0.0) | 0 (0.0) | 0 (0.0) | 0 (0.0) |
| myalgia                         | 0 (0.0) | 0 (0.0) | 1 (0.5) | 0 (0.0) | 0 (0.0) | 0 (0.0) | 0 (0.0) | 0 (0.0) |
| optic disc cupping              | 0 (0.0) | 0 (0.0) | 1 (0.5) | 0 (0.0) | 0 (0.0) | 0 (0.0) | 0 (0.0) | 0 (0.0) |
| pancreatitis                    | 0 (0.0) | 0 (0.0) | 1 (0.5) | 1 (0.5) | 0 (0.0) | 0 (0.0) | 0 (0.0) | 0 (0.0) |
| pityriasis rosea                | 0 (0.0) | 0 (0.0) | 1 (0.5) | 0 (0.0) | 0 (0.0) | 0 (0.0) | 0 (0.0) | 0 (0.0) |
| psoriasis                       | 0 (0.0) | 0 (0.0) | 0 (0.0) | 0 (0.0) | 0 (0.0) | 0 (0.0) | 1 (1.1) | 0 (0.0) |
| spondylolisthesis               | 0 (0.0) | 0 (0.0) | 1 (0.5) | 0 (0.0) | 0 (0.0) | 0 (0.0) | 0 (0.0) | 0 (0.0) |
| urolithiasis                    | 0 (0.0) | 0 (0.0) | 1 (0.5) | 0 (0.0) | 0 (0.0) | 0 (0.0) | 0 (0.0) | 0 (0.0) |
| uterine cancer                  | 0 (0.0) | 0 (0.0) | 1 (0.5) | 1 (0.5) | 0 (0.0) | 0 (0.0) | 0 (0.0) | 0 (0.0) |
| zinc deficiency                 | 0 (0.0) | 0 (0.0) | 0 (0.0) | 0 (0.0) | 0 (0.0) | 0 (0.0) | 1 (1.1) | 0 (0.0) |

Data are represented as n (%).

DPP-4i, dipeptidyl-peptidase 4 inhibitor; NT-proBNP, amino-terminal pro-brain natriuretic peptide
